# Supplementary material for: Organocatalytic aminocarbonylation of α,β-unsaturated ketones with N,N-dimethyl carbamoylsilane
Source: Royal Society of Chemistry journal article supplement (doi:10.1039/d1nj00782c), 2021-01-01

## *Supporting Information for*

### **Organocatalytic aminocarbonylation of $\alpha$ , $\beta$ -unsaturated ketones with N, N-dimethyl carbamoylsilane**

Shou-Shan Yang, Ying-Zheng Ren, Yu-Yu Guo, Guang-Fen Du\*, Zhi-Hua Cai,  
Lin He\*

Key Laboratory for Green Processing of Chemical Engineering of Xinjiang  
Bingtuan/School of Chemistry and Chemical Engineering, Shihezi University,  
Xinjiang Uygur Autonomous Region, 832000, People's Republic of China.

E-mail: duguangfen@shzu.edu.cn; helin@shzu.edu.cn

#### **Contents:**

1. General methods and typical experimental procedures .....S2-S3
2. Spectroscopic data for all products .....S4-S13
3. References ..... S14
4. Copies of  $^1\text{H}$  NMR and  $^{13}\text{C}$  NMR spectra .....S15-S36

## 1. General methods and typical experimental procedures

### 1.1 General methods

Unless otherwise indicated, all reactions were conducted under nitrogen atmosphere in oven-dried glassware with magnetic stirring bar. Column chromatograph was performed with silica gel (200~300 mesh) and analytical TLC on silica gel 60-F<sub>254</sub>. <sup>1</sup>H NMR (400 MHz, CDCl<sub>3</sub>), <sup>13</sup>C NMR (100 MHz, CDCl<sub>3</sub>) were recorded on a Bruker-DMX 400 spectrometer in CDCl<sub>3</sub>, with tetramethylsilane as an internal standard and reported in ppm ( $\delta$ ). Chalcones ( Table 2, **2a-o**, **2r**)<sup>[1]</sup>, ynone (Table 2, **2u**)<sup>[2]</sup> and other enones (Table 2, **2p-q**, **2s**)<sup>[3]</sup> were prepared according to literature procedure. Carbamoylsilane **1a** was purchased from Shanghai Shenghong Co., Ltd. Phosphazene bases *t*-Bu-P<sub>4</sub>, *t*-Bu-P<sub>1</sub> and *t*-Bu-P<sub>2</sub> were purchased from Sigma-Aldrich. All other chemicals were obtained from commercial supplies and used as received without any further purification. Anhydrous THF and toluene were distilled from sodium and benzophenone. Anhydrous DMF, DMSO and CH<sub>3</sub>CN were obtained from commercial suppliers. Petroleum ether, where used, has a boiling point range of 60-90 °C.

### 1.2 General procedure for *t*-Bu-P<sub>4</sub>-catalyzed aminocarbonylation

**reaction of ketones:** To a solution of *t*-Bu-P<sub>4</sub> in hexane (0.80 M, 13  $\mu$ L, 10 mol%) was added to a stirred solution of carbamoylsilane **1a** (24  $\mu$ L,

0.15 mmol, 1.5 equiv.) and ketone **2** (0.1 mmol) in dry DMF (1 mL) under nitrogen. The resulting mixture was stirred at room temperature until full consumption of **2** that was indicated by TLC (24h). Then, the mixture was diluted with 15.0 mL EtOAc and washed with water (2.0 mL  $\times$  3). The organic layer was separated, dried over anhyd. Na<sub>2</sub>SO<sub>4</sub> and filtered. The solvent was then removed under reduced pressure and the crude material was purified by flash column chromatography (silica gel, PE/EtOAc (v : v) = 20:1~5:1) to give the desired product **3**.

## 2. Spectroscopic data for all products

### (E)-N,N-dimethyl-2,4-diphenyl-2-((trimethylsilyl)oxy)but-3-enamide

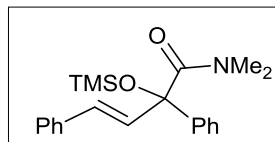

**(3a)**<sup>[4]</sup>: 25.0 mg, 73% yield; pale yellow oil; <sup>1</sup>H NMR (400 MHz, CDCl<sub>3</sub>)  $\delta$  7.46 – 7.40 (m, 2H), 7.38 – 7.13

(m, 9H), 5.90 (d,  $J$  = 16.2 Hz, 1H), 2.94 (s, 3H), 2.76 (s, 3H), 0.19 (s, 9H);

<sup>13</sup>C NMR (100 MHz, CDCl<sub>3</sub>)  $\delta$  172.7, 142.2, 136.8, 134.1, 131.7, 128.4, 128.1, 127.6, 127.2, 126.6, 125.3, 81.8, 37.7, 37.1, 1.85.

### (E)-2-hydroxy-N,N-dimethyl-4-phenyl-2-(*p*-tolyl)but-3-enamide (**3b**):

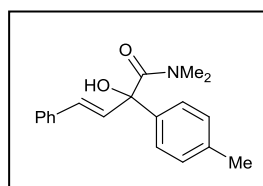

23.5 mg, 80% yield; pale yellow solid; m.p.

182.5-182.7 °C; <sup>1</sup>H NMR (400 MHz, CDCl<sub>3</sub>)  $\delta$  7.44 –

7.36 (m, 2H), 7.33 – 7.25 (m, 2H), 7.23 – 7.14 (m, 3H),

7.10 (d,  $J$  = 7.9 Hz, 2H), 6.99 (d,  $J$  = 15.6 Hz, 1H), 6.70 (d,  $J$  = 15.6 Hz,

1H), 5.63 (s, 1H), 3.00 (s, 3H), 2.66 (s, 3H), 2.27 (s, 3H); <sup>13</sup>C NMR (100

MHz, CDCl<sub>3</sub>)  $\delta$  173.3, 139.6, 138.0, 136.6, 132.6, 129.7, 128.6, 128.0,

127.5, 126.8, 126.3, 77.7, 38.6, 37.7, 21.1; IR (KBr):  $\nu$  = 3658, 2916,

1718, 1631, 1458, 1103, 1043, 962, 819 cm<sup>-1</sup>; HRMS (ESI)  $m/z$  calcd for

C<sub>19</sub>H<sub>21</sub>NO<sub>2</sub> [M+Na]<sup>+</sup> 318.1465, found 318.1464.

### (E)-N,N-dimethyl-2-hydroxy-2-phenyl-4-(*p*-tolyl)but-3-enamide (**3c**):

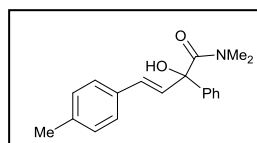

22 mg, 75% yield; white solid; m.p. 191.2-192.0 °C;

<sup>1</sup>H NMR (400 MHz, CDCl<sub>3</sub>)  $\delta$  7.39 – 7.28 (m, 7H),

7.16 (d,  $J$  = 7.6 Hz, 2H), 7.05 (d,  $J$  = 15.6 Hz, 1H), 6.73 (d,  $J$  = 15.6 Hz,

1H), 5.75 (s, 1H), 3.08 (s, 3H), 2.71 (s, 3H), 2.36 (s, 3H); <sup>13</sup>C NMR (100 MHz, CDCl<sub>3</sub>) δ 173.2, 142.6, 138.0, 133.7, 132.6, 129.4, 129.0, 128.2, 126.7, 126.4, 126.2, 77.8, 38.5, 37.7, 21.3; IR (KBr): ν = 3624, 2922, 1640, 1550, 1446, 1104, 1078, 967, 795 cm<sup>-1</sup>; HRMS (ESI) *m/z* calcd for C<sub>19</sub>H<sub>21</sub>NO<sub>2</sub> [M+Na]<sup>+</sup> 318.1465, found 318.1468.

**(E)-N,N-dimethyl-2-hydroxy-4-(4-methoxyphenyl)-2-phenylbut-3-enamide (3d):** 24 mg, 79% yield; pale yellow solid; m.p.

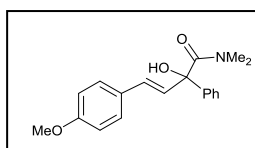

187.3-188.1 °C; <sup>1</sup>H NMR (400 MHz, CDCl<sub>3</sub>) δ 7.46 – 7.27 (m, 7H), 7.01 (d, *J* = 15.6 Hz, 1H), 6.93 – 6.83 (m, 2H), 6.64 (d, *J* = 15.6 Hz, 1H), 5.72 (s, 1H), 3.83 (s, 3H), 3.08 (s, 3H), 2.71 (s, 3H); <sup>13</sup>C NMR (100 MHz, CDCl<sub>3</sub>) δ 173.3, 159.6, 142.7, 132.1, 129.3, 129.0, 128.1, 128.1, 126.4, 125.0, 114.1, 77.8, 55.3, 38.5, 37.7; IR (KBr): ν = 3534, 3012, 1636, 1511, 1364, 1249, 1031, 846, 789; HRMS (ESI) *m/z* calcd for C<sub>19</sub>H<sub>21</sub>NO<sub>3</sub> [M+Na]<sup>+</sup> 334.1411, found 334.1408.

**(E)-2-(4-methoxyphenyl)-N,N-dimethyl-4-phenyl-2-((trimethylsilyl)oxy)but-3-enamide (3e):** 30 mg, 78% yield; pale yellow oil; <sup>1</sup>H NMR (400

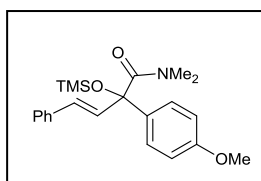

MHz, CDCl<sub>3</sub>) δ 7.39 – 7.25 (m, 5H), 7.25 – 7.09 (m, 3H), 6.89 (d, *J* = 8.80 Hz, 2H), 5.90 (d, *J* = 16.0 Hz, 1H), 3.83 (s, 3H), 2.94 (s, 3H), 2.80 (s, 3H), 0.18 (s, 9H); <sup>13</sup>C NMR (100 MHz, CDCl<sub>3</sub>) δ 172.4, 158.2, 136.3, 133.8, 133.7, 131.0, 127.9, 127.0, 126.2, 126.9, 112.9, 81.2, 54.8, 37.3, 36.6, 1.40; IR

(KBr):  $\nu = 2925, 1643, 1601, 1447, 1252, 1097, 896, 842 \text{ cm}^{-1}$ ; HRMS (APCI)  $m/z$  calcd for  $\text{C}_{22}\text{H}_{29}\text{NO}_3\text{Si}$   $[\text{M}+\text{H}]^+$  384.1990, found 384.1981.

**(E)-2-hydroxy-N,N-dimethyl-2,4-di-p-tolylbut-3-enamide (3f):**

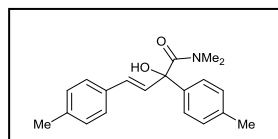

24mg, 79% yield; white solid; m.p. 176.4-177.1 °C;  $^1\text{H}$  NMR (400 MHz,  $\text{CDCl}_3$ )  $\delta$  7.37 (d,  $J = 8.4$  Hz, 2H), 7.25 – 7.22 (m, 2H), 7.18 – 7.15 (m, 4H), 7.03 (d,  $J = 15.6$  Hz, 1H), 6.72 (d,  $J = 15.6$  Hz, 1H), 5.71 (s, 1H), 3.07 (s, 3H), 2.73 (s, 3H), 2.36 (s, 3H), 2.34 (s, 3H);  $^{13}\text{C}$  NMR (100 MHz,  $\text{CDCl}_3$ )  $\delta$  173.4, 139.7, 137.9, 137.9, 133.8, 132.4, 129.7, 129.4, 126.7, 126.4, 126.3, 77.6, 38.6, 37.7, 21.3, 21.2; IR (KBr):  $\nu = 3609, 2923, 1654, 1502, 1455, 1254, 1095, 896, 824 \text{ cm}^{-1}$ ; HRMS (ESI)  $m/z$  calcd for  $\text{C}_{20}\text{H}_{23}\text{NO}_2$   $[\text{M}+\text{Na}]^+$  332.1621, found 332.1622.

**(E)-4-(4-methoxyphenyl)-N,N-dimethyl-2-(p-tolyl)-2-((trimethylsilyloxy)but-3-enamide (3g) :**

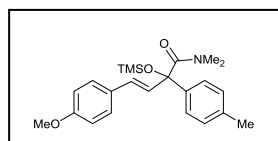

30 mg, 75% yield; pale yellow oil;  $^1\text{H}$  NMR (400 MHz,  $\text{CDCl}_3$ )  $\delta$  7.30 (d,  $J = 8.0$  Hz, 2H), 7.25 (d,  $J = 8.8$  Hz, 2H), 7.17 – 7.11 (m, 2H), 7.01 (d,  $J = 16.2$  Hz, 1H), 6.79 (d,  $J = 8.8$  Hz, 2H), 5.83 (d,  $J = 16.4$  Hz, 1H), 3.78 (s, 3H), 2.94 (s, 3H), 2.78 (s, 3H), 2.36 (s, 3H), 0.17 (s, 9H);  $^{13}\text{C}$  NMR (100 MHz,  $\text{CDCl}_3$ )  $\delta$  173.0, 159.1, 139.3, 136.6, 132.1, 131.1, 129.7, 128.7, 127.8, 125.4, 113.8, 81.9, 55.2, 37.8, 37.1, 21.1, 1.9; IR

(KBr):  $\nu = 2920, 1641, 1511, 1390, 1250, 1063, 896, 841 \text{ cm}^{-1}$ ; HRMS (ESI)  $m/z$  calcd for  $\text{C}_{23}\text{H}_{31}\text{NO}_3\text{Si}$   $[\text{M}+\text{Na}]^+$  420.1966, found 420.1959.

**(E)-2-(4-chlorophenyl)-N,N-dimethyl-4-phenyl-2-((trimethylsilyl)oxy)but-3-enamide (3h):** 25 mg, 65% yield; pale yellow oil;  $^1\text{H}$  NMR (400

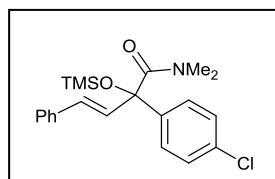

MHz,  $\text{CDCl}_3$ )  $\delta$  7.53 – 7.19 (m, 9H), 7.15 (d,  $J = 16.4$  Hz, 1H), 5.87 (d,  $J = 16.0$  Hz, 1H), 2.94 (s, 3H), 2.78 (s, 3H), 0.18 (s, 9H);  $^{13}\text{C}$  NMR (100 MHz,  $\text{CDCl}_3$ )  $\delta$

172.3, 140.9, 136.5, 133.7, 133.0, 132.0, 128.5, 128.3, 127.7, 126.9, 126.6, 81.5, 37.7, 37.1, 1.81; IR (KBr):  $\nu = 2923, 1644, 1488, 1398, 1253, 1089, 894, 841 \text{ cm}^{-1}$ ; HRMS (ESI)  $m/z$  calcd for  $\text{C}_{21}\text{H}_{26}\text{ClNO}_2\text{Si}$   $[\text{M}+\text{Na}]^+$  410.1314, found 410.1311.

**(E)-2-(3-methoxyphenyl)-N,N-dimethyl-4-phenyl-2-((trimethylsilyl)oxy)but-3-enamide (3i):** 29mg, 78% yield; pale yellow

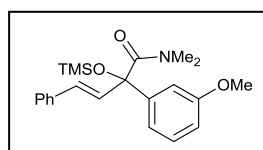

oil;  $^1\text{H}$  NMR (400 MHz,  $\text{CDCl}_3$ )  $\delta$  7.43 (m, 2H), 7.40 – 7.31 (m, 2H), 7.33 – 7.25 (m, 1H), 7.22 – 7.12 (m,

2H), 6.93 – 6.81 (m, 2H), 6.75 (dd,  $J = 7.8, 2.2$  Hz, 1H), 5.87 (d,  $J = 16.2$  Hz, 1H), 3.78 (s, 3H), 2.95 (s, 3H), 2.77 (s, 3H), 0.19 (s, 9H);  $^{13}\text{C}$  NMR (100 MHz,  $\text{CDCl}_3$ )  $\delta$  172.6, 159.6, 142.2, 138.2, 134.4, 131.6, 129.3, 128.1, 127.2, 125.3, 119.4, 113.5, 111.5, 81.8, 55.2, 37.7, 37.1, 1.9; IR (KBr):  $\nu = 3083, 1645, 1558, 1489, 1254, 1055, 893, 842 \text{ cm}^{-1}$ ; HRMS (ESI)  $m/z$  calcd for  $\text{C}_{22}\text{H}_{29}\text{NO}_2\text{Si}$   $[\text{M}+\text{Na}]^+$  406.1806, found 406.1811.

**(E)-N,N-dimethyl-4-(2-methoxyphenyl)-2-phenyl-2-((trimethylsilyl)oxy)but-3-enamide (3j):** 28 mg, 76% yield; pale yellow oil;  $^1\text{H}$  NMR (400

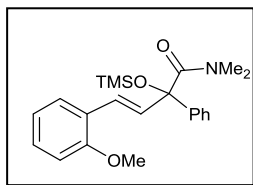

MHz,  $\text{CDCl}_3$ )  $\delta$  7.47 – 7.30 (m, 5H), 7.28 – 7.13 (m, 3H), 6.87 (t,  $J = 7.6$  Hz, 1H), 6.79 (d,  $J = 7.6$  Hz, 1H), 6.33 (d,  $J = 16.0$  Hz, 1H), 3.72 (s, 3H), 2.95 (s, 3H),

2.77 (s, 3H), 0.19 (s, 9H);  $^{13}\text{C}$  NMR (100 MHz,  $\text{CDCl}_3$ )  $\delta$  172.8, 156.8, 142.7, 134.4, 128.5, 128.1, 127.2, 127.0, 126.3, 125.9, 125.3, 120.5, 110.8, 82.3, 55.4, 37.8, 37.1, 1.8; IR (KBr):  $\nu = 2955, 1644, 1489, 1464, 1246, 1026, 897, 843$   $\text{cm}^{-1}$ ; HRMS (ESI)  $m/z$  calcd for  $\text{C}_{22}\text{H}_{29}\text{NO}_2\text{Si}$   $[\text{M}+\text{Na}]^+$  406.1806, found 406.1815.

**(E)-N,N-dimethyl-4-(3-methoxyphenyl)-2-phenyl-2-((trimethylsilyl)oxy)but-3-enamide (3k):** 29 mg, 76% yield; pale yellow oil;  $^1\text{H}$  NMR (400

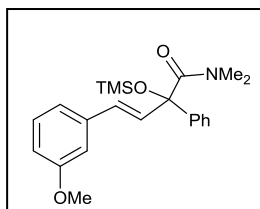

MHz,  $\text{CDCl}_3$ )  $\delta$  7.43 (m, 2H), 7.38 – 7.32 (m, 2H), 7.29 (m, 1H), 7.22 – 7.12 (m, 2H), 6.90 (d,  $J = 7.6$  Hz, 1H), 6.86 – 6.83 (m, 1H), 6.77 – 6.72 (m, 1H), 5.87 (d,

$J = 16.4$  Hz, 1H), 3.78 (s, 3H), 2.95 (s, 3H), 2.77 (s, 3H), 0.19 (s, 9H);  $^{13}\text{C}$  NMR (100 MHz,  $\text{CDCl}_3$ )  $\delta$  172.7, 159.7, 142.3, 138.3, 134.4, 131.7, 129.4, 128.1, 127.2, 125.3, 119.4, 113.6, 111.6, 81.9, 55.2, 37.7, 37.1, 1.9; IR (KBr):  $\nu = 2943, 1729, 1636, 1446, 1248, 1023, 891, 823$   $\text{cm}^{-1}$ ; HRMS (ESI)  $m/z$  calcd for  $\text{C}_{22}\text{H}_{29}\text{NO}_3\text{Si}$   $[\text{M}+\text{Na}]^+$  406.1809, found 406.1801.



**(E)-N,N-dimethyl-4-(3-bromophenyl)-2-phenyl-2-((trimethylsilyl)oxy)**

**but-3-enamide (3l):** 27 mg, 64% yield; pale yellow oil;  $^1\text{H}$  NMR (400

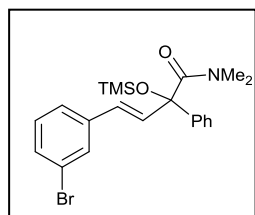

MHz,  $\text{CDCl}_3$ )  $\delta$  7.44 – 7.28 (m, 7H), 7.25 – 7.07 (m, 3H), 5.82 (d,  $J = 16.4$  Hz, 1H), 2.95 (s, 3H), 2.75 (s, 3H), 0.19 (s, 9H);  $^{13}\text{C}$  NMR (100 MHz,  $\text{CDCl}_3$ )  $\delta$  172.5,

142.0, 139.0, 135.8, 130.4, 130.1, 129.9, 129.6, 128.2, 127.3, 125.2, 125.0, 122.6, 81.7, 37.6, 37.0, 1.8; IR (KBr):  $\nu = 2928, 1730, 1635, 1476, 1251, 1065, 871, 814$   $\text{cm}^{-1}$ ; HRMS (ESI)  $m/z$  calcd for  $\text{C}_{21}\text{H}_{26}\text{BrNO}_2\text{Si}$   $[\text{M}+\text{Na}]^+$  454.0808, found 454.0811.

**(E)-2-hydroxy-N,N-dimethyl-2-(4-methoxyphenyl)-4-(o-tolyl)but-3-en**

**amide (3m):** 25mg, 77% yield; white solid; m.p.

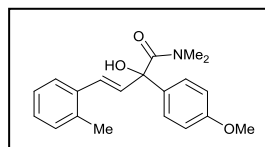

181.3-181.9  $^{\circ}\text{C}$ ;  $^1\text{H}$  NMR (400 MHz,  $\text{CDCl}_3$ )  $\delta$  7.55 – 7.49 (m, 1H), 7.35 – 7.27 (m, 3H), 7.20 (m, 3H), 6.95

– 6.85 (m, 2H), 6.63 (d,  $J = 15.2$  Hz, 1H), 5.72 (s, 1H), 3.81 (s, 3H), 3.08 (s, 3H), 2.75 (s, 3H), 2.38 (s, 3H);  $^{13}\text{C}$  NMR (100 MHz,  $\text{CDCl}_3$ )  $\delta$  173.4, 159.3, 136.1, 135.8, 134.9, 130.5, 130.5, 128.9, 127.9, 127.7, 126.1, 125.8, 114.3, 77.6, 55.3, 38.6, 37.8, 19.9; IR (KBr):  $\nu = 3629, 2925, 1632, 1511, 1366, 1249, 1034, 835, 748$   $\text{cm}^{-1}$ ; HRMS (ESI)  $m/z$  calcd for  $\text{C}_{20}\text{H}_{23}\text{NO}_3$   $[\text{M}+\text{Na}]^+$  348.1570, found 348.1566.

**(E)-4-(furan-2-yl)-N,N-dimethyl-2-phenyl-2-((trimethylsilyl)oxy)but-**

**3-enamide (3n)<sup>[4]</sup>:** 24 mg, 72% yield; pale yellow oil;  $^1\text{H}$  NMR (400

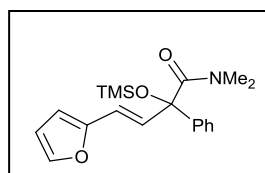

MHz, CDCl<sub>3</sub>)  $\delta$  7.42 – 7.40 (m, 2H), 7.36 (m, 2H), 7.31 – 7.27 (m, 2H), 7.05 (d,  $J$  = 16.0 Hz, 1H), 6.30 (dd,  $J$  = 4.8, 1.6 Hz, 1H), 6.12 (d,  $J$  = 3.6 Hz, 1H), 5.66 (d,  $J$  = 16.4 Hz, 1H), 2.94 (s, 3H), 2.75 (s, 3H), 0.20 (s, 9H); <sup>13</sup>C NMR (100 MHz, CDCl<sub>3</sub>)  $\delta$  172.5, 152.5, 142.1, 141.7, 132.8, 128.1, 127.3, 125.5, 120.1, 111.1, 108.3, 81.9, 37.7, 37.0, 1.80.

**(E)-2-hydroxy-N,N-dimethyl-2-phenyl-4-(thiophen-2-yl)but-3-enamide (3o):** 20 mg, 71% yield; white solid; m.p. 171.5-172.1 °C; <sup>1</sup>H NMR (400

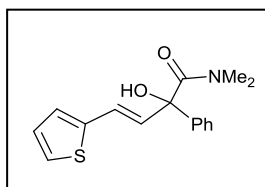

MHz, CDCl<sub>3</sub>)  $\delta$  7.43 – 7.27 (m, 5H), 7.25 – 7.17 (m, 2H), 7.11 – 6.94 (m, 2H), 6.61 (d,  $J$  = 15.6 Hz, 1H), 5.76 (s, 1H), 3.08 (s, 3H), 2.71 (s, 3H); <sup>13</sup>C NMR (100 MHz, CDCl<sub>3</sub>)  $\delta$  172.9, 142.3, 141.5, 129.1, 128.3, 127.7, 126.9, 126.5, 126.4, 126.1, 124.7, 77.7, 38.5, 37.8; IR (KBr):  $\nu$  = 3729, 2921, 1636, 1493, 1367, 1257, 1108, 889, 771 cm<sup>-1</sup>; HRMS (ESI)  $m/z$  calcd for C<sub>16</sub>H<sub>17</sub>NO<sub>2</sub>S [M+Na]<sup>+</sup> 310.0872, found 310.0871.

**(E)-4-(4-chlorophenyl)-N,N,2-trimethyl-2-((trimethylsilyl)oxy)but-3-enamide (3p):** 18 mg, 56% yield; pale yellow oil; <sup>1</sup>H

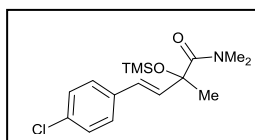

NMR (400 MHz, CDCl<sub>3</sub>)  $\delta$  7.29 (d,  $J$  = 1.2 Hz, 4H), 6.55 (d,  $J$  = 16.0 Hz, 1H), 6.29 (d,  $J$  = 16.0 Hz, 1H), 3.10 (s, 3H), 2.93 (s, 3H), 1.63 (s, 3H), 0.18 (s, 9H); <sup>13</sup>C NMR (100 MHz, CDCl<sub>3</sub>)  $\delta$  172.5, 135.0, 134.3, 133.2, 128.7, 127.6, 126.3, 79.3, 38.2, 37.2, 28.6, 1.60; IR (KBr):  $\nu$  = 2981, 1664, 1550, 1476, 1243, 1091, 713, 665

cm<sup>-1</sup>; HRMS (ESI) *m/z* calcd for C<sub>16</sub>H<sub>24</sub>ClNO<sub>2</sub>Si [M+Na]<sup>+</sup> 348.1157, found 348.1160.

**(E)-2-hydroxy-N,N,2-trimethyl-4-phenylbut-3-enamide (3q):** 16 mg,

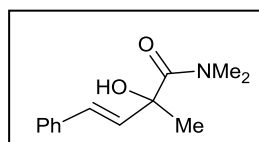

75% yield; pale yellow oil; <sup>1</sup>H NMR (400 MHz, CDCl<sub>3</sub>)  $\delta$  7.43 – 7.37 (m, 2H), 7.33 – 7.30 (m, 2H), 7.26 – 7.22

(m, 1H), 6.69 (d, *J* = 16.4 Hz, 1H), 6.36 (d, *J* = 16.4 Hz, 1H), 5.15 (s, 1H), 3.08 (s, 6H), 1.67 (s, 3H); <sup>13</sup>C NMR (100 MHz, CDCl<sub>3</sub>)  $\delta$  174.6, 136.3, 131.0, 130.6, 128.6, 128.0, 126.6, 72.9, 48.9, 44.4, 24.7; IR (KBr):  $\nu$  = 3713, 2923, 1625, 1491, 1360, 1255, 1163, 971, 749 cm<sup>-1</sup>; HRMS (ESI) *m/z* calcd for C<sub>13</sub>H<sub>17</sub>NO<sub>2</sub> [M+Na]<sup>+</sup> 242.1151, found 242.1151.

**(3E,5E)-N,N-dimethyl-2,6-diphenyl-2-((trimethylsilyl)oxy)hexa-3,5-dienamide (3r)<sup>[4]</sup>:** 28mg, 74% yield; white solid; m.p. 113.8-114.4 °C; <sup>1</sup>H

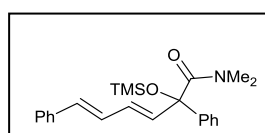

NMR (400 MHz, CDCl<sub>3</sub>)  $\delta$  7.46 – 7.27 (m, 9H), 7.23 – 7.13 (m, 1H), 6.87 – 6.71 (m, 2H), 6.34 (d, *J* = 15.6

Hz, 1H), 5.69 (dd, *J* = 15.2, 10.4 Hz, 1H), 2.94 (s, 3H), 2.74 (s, 3H), 0.19 (s, 9H); <sup>13</sup>C NMR (100 MHz, CDCl<sub>3</sub>)  $\delta$  172.6, 142.1, 138.1, 137.2, 133.0, 132.2, 128.6, 128.5, 128.1, 127.5, 127.2, 126.3, 125.2, 81.8, 37.7, 37.1, 1.84.

**(E)-N,N-dimethyl-4-phenyl-2-((E)-styryl)-2-((trimethylsilyl)oxy)but-3-enamide (3s)<sup>[4]</sup>:** 31 mg, 82% yield; white solid;

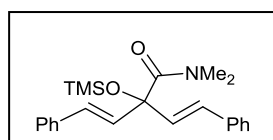

115.8-116.6 °C;  $^1\text{H}$  NMR (400 MHz,  $\text{CDCl}_3$ )  $\delta$  7.43 (m, 4H), 7.36 – 7.30 (m, 4H), 7.27 (t,  $J = 1.2$  Hz, 1H), 7.25 – 7.22 (m, 1H), 6.66 (q,  $J = 16.4$  Hz, 4H), 3.15 (s, 3H), 2.98 (s, 3H), 0.17 (s, 9H);  $^{13}\text{C}$  NMR (100 MHz,  $\text{CDCl}_3$ )  $\delta$  172.0, 136.5, 130.9, 130.5, 128.6, 127.7, 126.7, 80.8, 38.1, 37.4, 1.92.

**(E)-2-benzoyl-N,N-dimethyl-4-phenyl-2-((trimethylsilyl)oxy)but-3-enamide (3t):**

26 mg, 70% yield; pale yellow oil;  $^1\text{H}$  NMR (400 MHz,

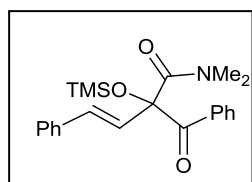

$\text{CDCl}_3$ )  $\delta$  7.54 (d,  $J = 16.0$  Hz, 1H), 7.46 – 7.35 (m, 6H), 7.34 – 7.27 (m, 4H), 6.92 (d,  $J = 15.6$  Hz, 1H), 3.03 (s, 3H), 2.83 (s, 3H), 0.26 (s, 9H);  $^{13}\text{C}$  NMR (100 MHz,

$\text{CDCl}_3$ )  $\delta$  194.5, 171.0, 140.9, 138.9, 134.9, 130.0, 128.8, 128.6, 128.4, 128.4, 126.1, 123.1, 88.0, 38.3, 36.2, 2.15; IR (KBr):  $\nu = 2837, 1701, 1559, 1368, 1241, 1068, 931, 842$   $\text{cm}^{-1}$ ; HRMS (ESI)  $m/z$  calcd for  $\text{C}_{22}\text{H}_{27}\text{NO}_3\text{Si}$   $[\text{M}+\text{Na}]^+$  404.1652, found 404.1650.

**N,N-dimethyl-2,4-diphenyl-2-((trimethylsilyl)oxy)but-3-ynamide (3u)**

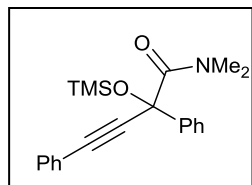

<sup>[4]</sup>: 23 mg, 66% yield; pale yellow oil;  $^1\text{H}$  NMR (400 MHz,  $\text{CDCl}_3$ )  $\delta$  7.67 – 7.62 (m, 2H), 7.56 – 7.46 (m, 2H), 7.44 – 7.31 (m, 6H), 2.99 (d,  $J = 6.4$  Hz, 6H), 0.25

(s, 9H);  $^{13}\text{C}$  NMR (100 MHz,  $\text{CDCl}_3$ )  $\delta$  169.5, 141.8, 131.5, 128.7, 128.7, 128.3, 128.3, 128.0, 127.2, 125.9, 122.4, 88.9, 38.2, 37.7, 1.53.

**(E)-2-hydroxy-N,N-dimethyl-2,4-diphenylbut-3-enamide (3v):** 20.5

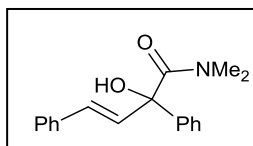

mg, 73% yield; pale yellow solid; m.p. 199.6-200.5 °C;

$^1\text{H}$  NMR (400 MHz,  $\text{CDCl}_3$ )  $\delta$  7.48 (d,  $J = 6.8$  Hz, 2H),

7.40 – 7.26 (m, 8H), 7.09 (d,  $J = 15.6$  Hz, 1H), 6.79 (d,  $J = 15.6$  Hz, 1H),

5.74 (s, 1H), 3.08 (s, 3H), 2.73 (s, 3H);  $^{13}\text{C}$  NMR (100 MHz,  $\text{CDCl}_3$ )  $\delta$

173.1, 142.5, 136.5, 132.7, 129.0, 128.7, 128.2, 128.0, 127.2, 126.8,

126.4, 77.9, 38.5, 37.7; IR (KBr):  $\nu = 3426, 2924, 1633, 1495, 1446,$

1247, 1118, 893, 825  $\text{cm}^{-1}$ ; HRMS (ESI)  $m/z$  calcd for  $\text{C}_{18}\text{H}_{19}\text{NO}_2$

$[\text{M}+\text{Na}]^+$  304.1308, found 304.1308.

### 3. Reference

- 1 Y. J. Li, H. Xu, M. M. Xing, F. Huang, J. H. Jia and J. R. Gao, *Org. Lett.* 2015, **17**, 3690.
- 2 V. Le Foulher, Y. Chen, V. Gandon, V. Bizet, C. Salome, T. Fessard, F. Liu, K. N. Houk and N. Blanchard, *J. Am. Chem. Soc.* 2019, **141**, 15901.
- 3 X. Liu, X. X. Xu, L. Pan, Q. Zhang and Q. Liu, *Org. Biomol. Chem.*, 2013, **11**, 6703.
- 4 Y. Yao, W. D. Li and J. X. Chen, *Chin. J. of Org. Chem.*, 2014, **34**, 2124.

## 4. Copies of $^1\text{H}$ NMR and $^{13}\text{C}$ NMR Spectra

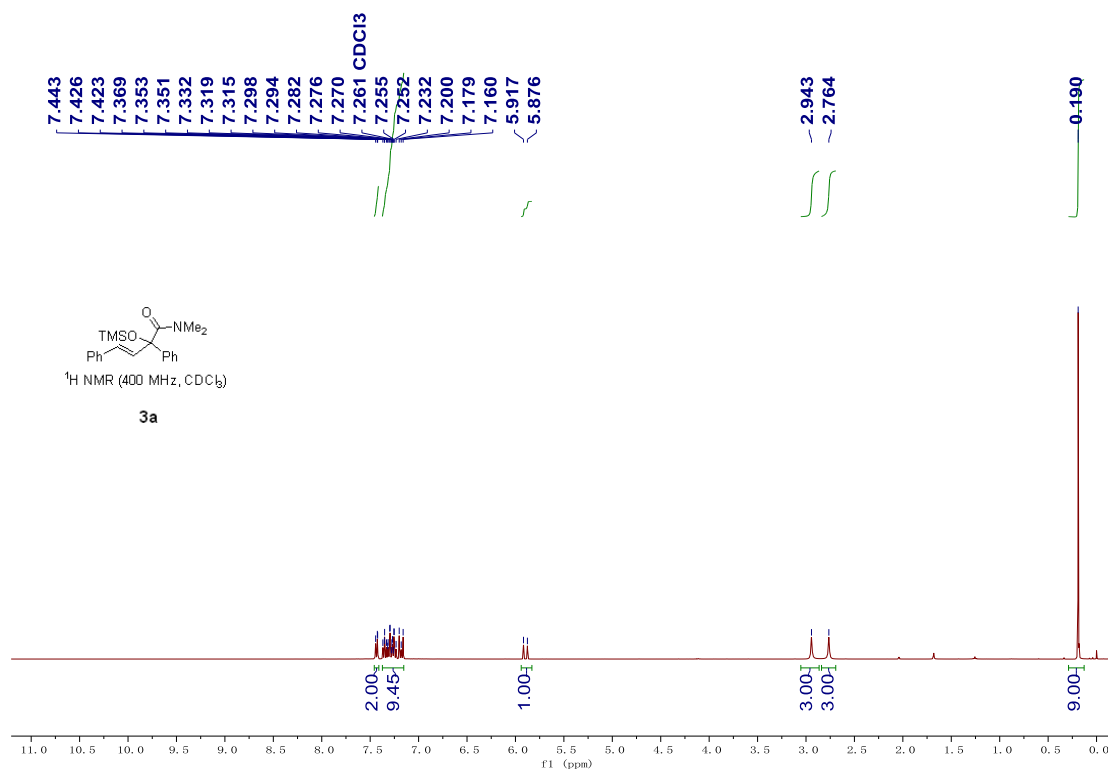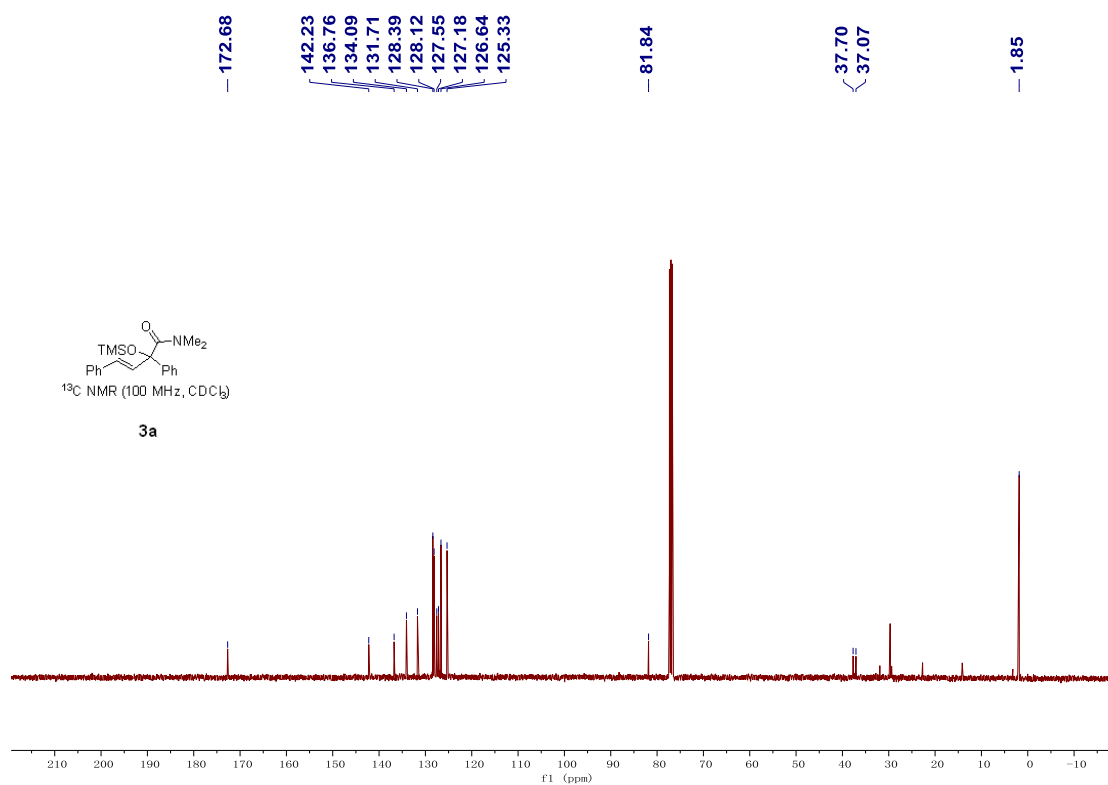

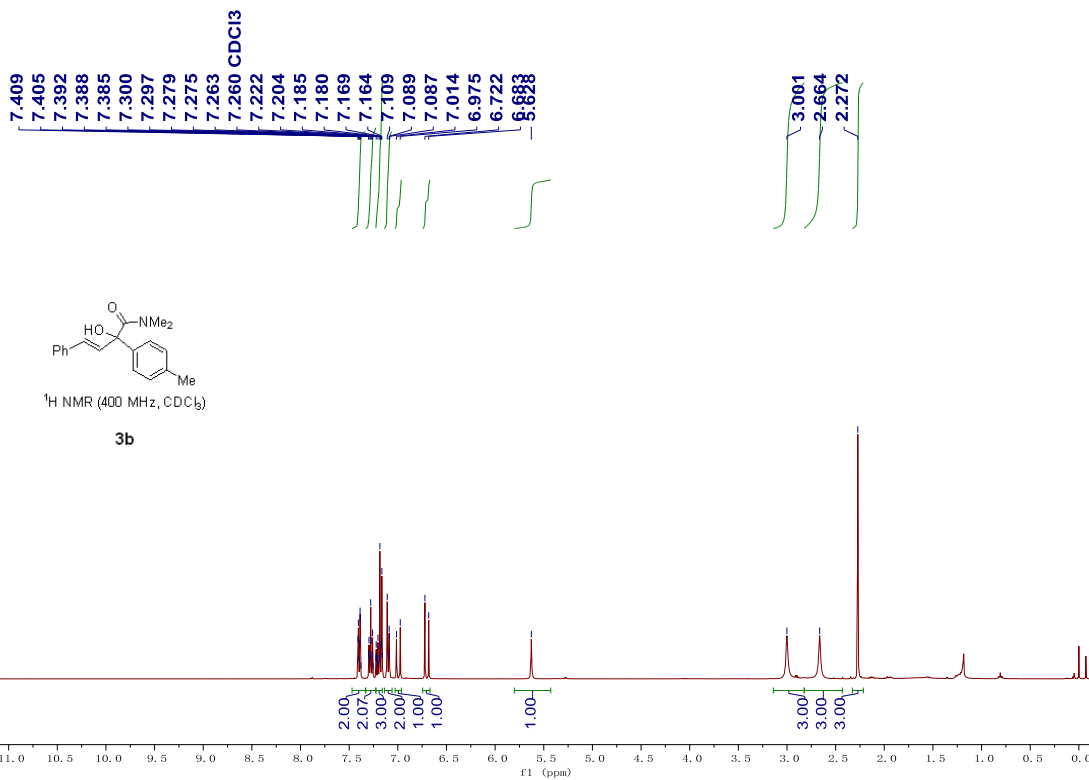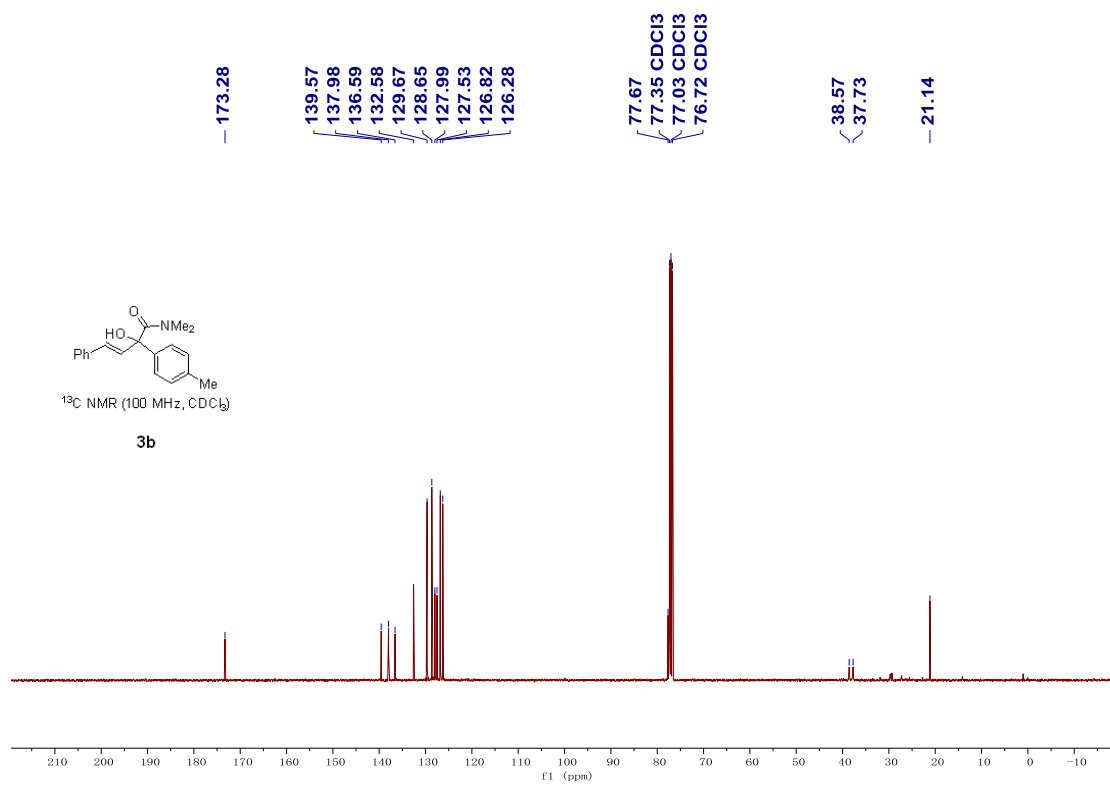



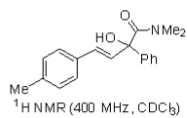

**3c**

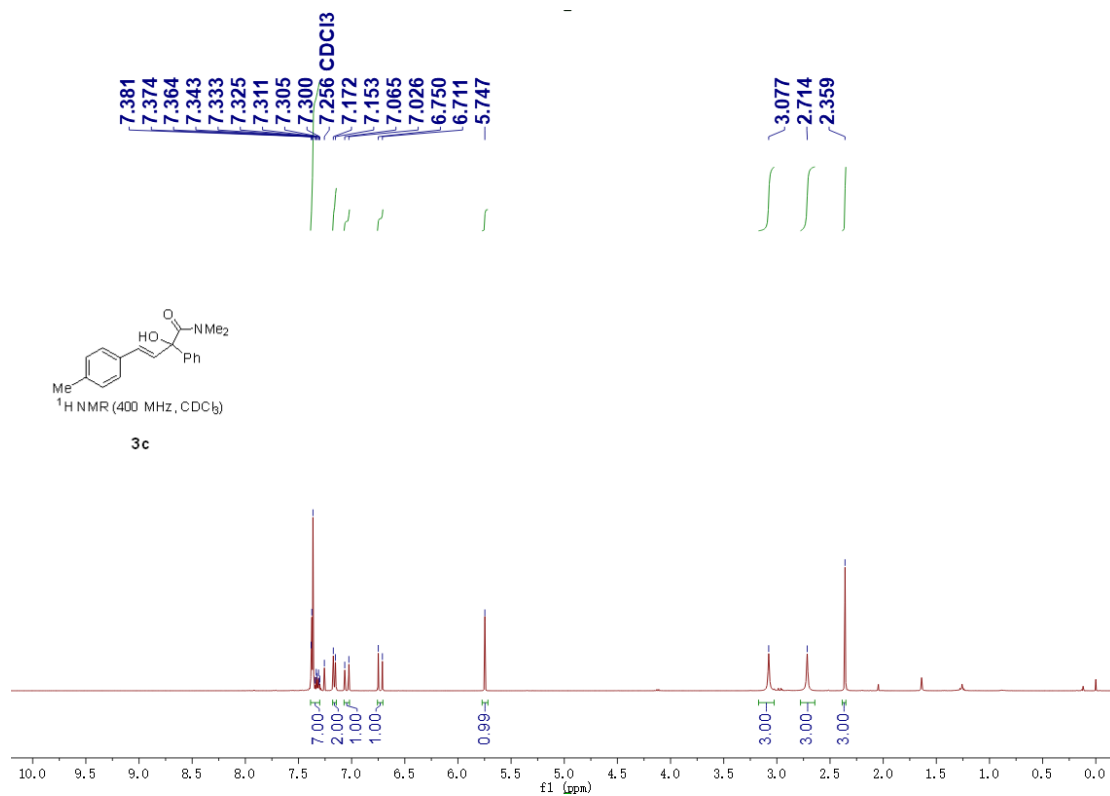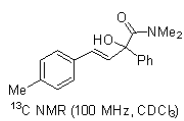

**3c**

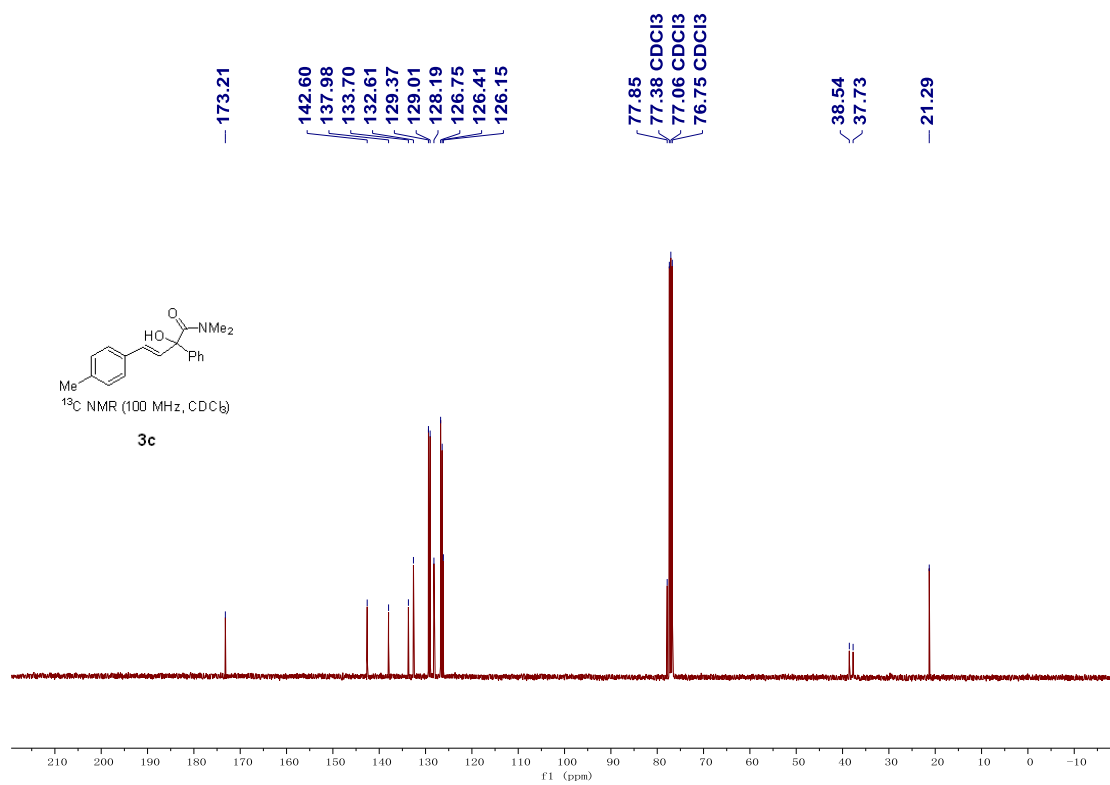

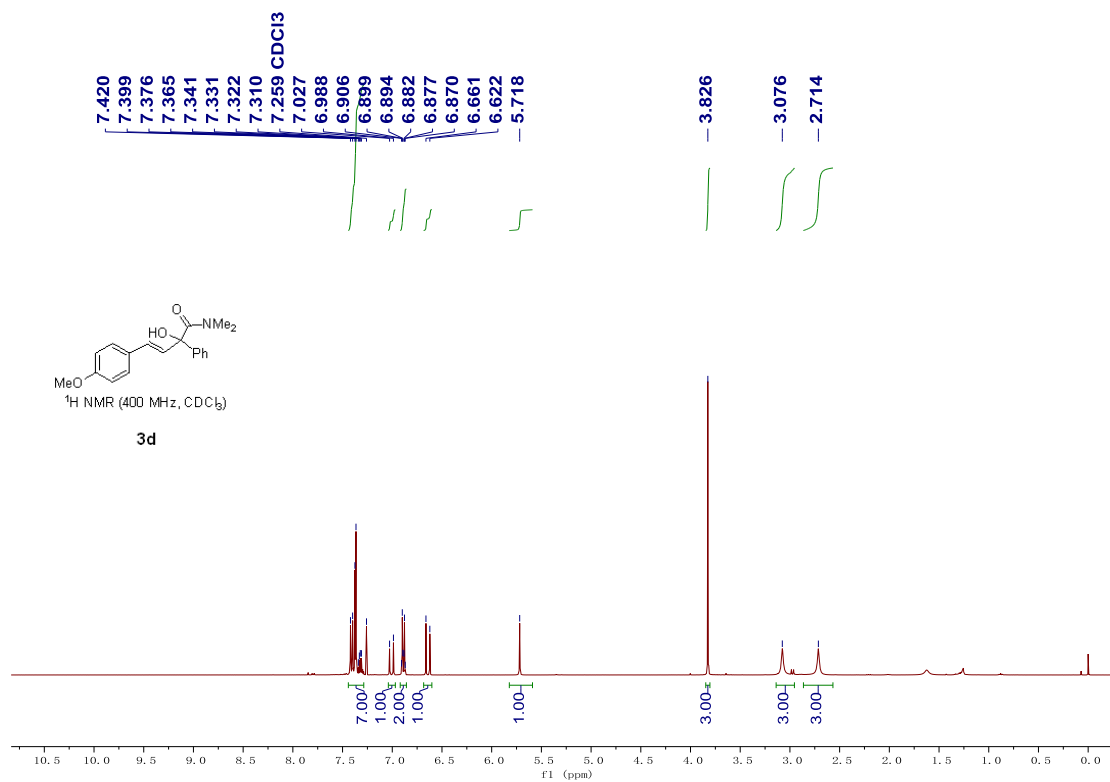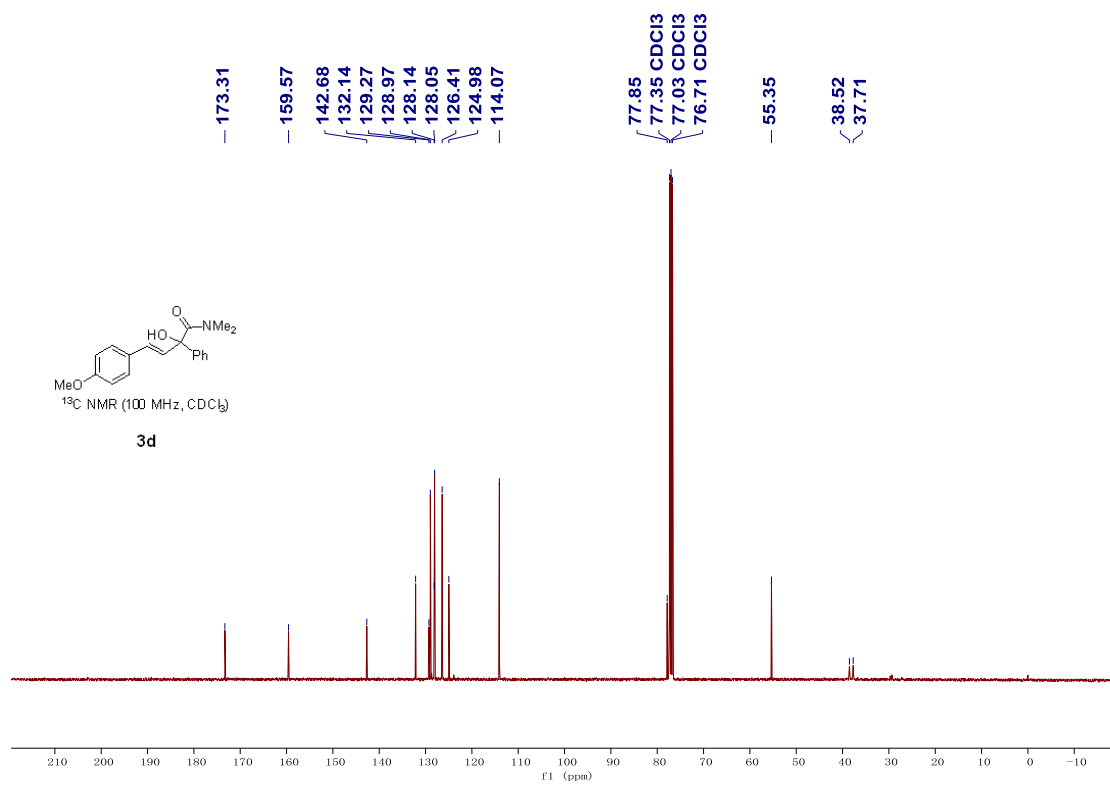

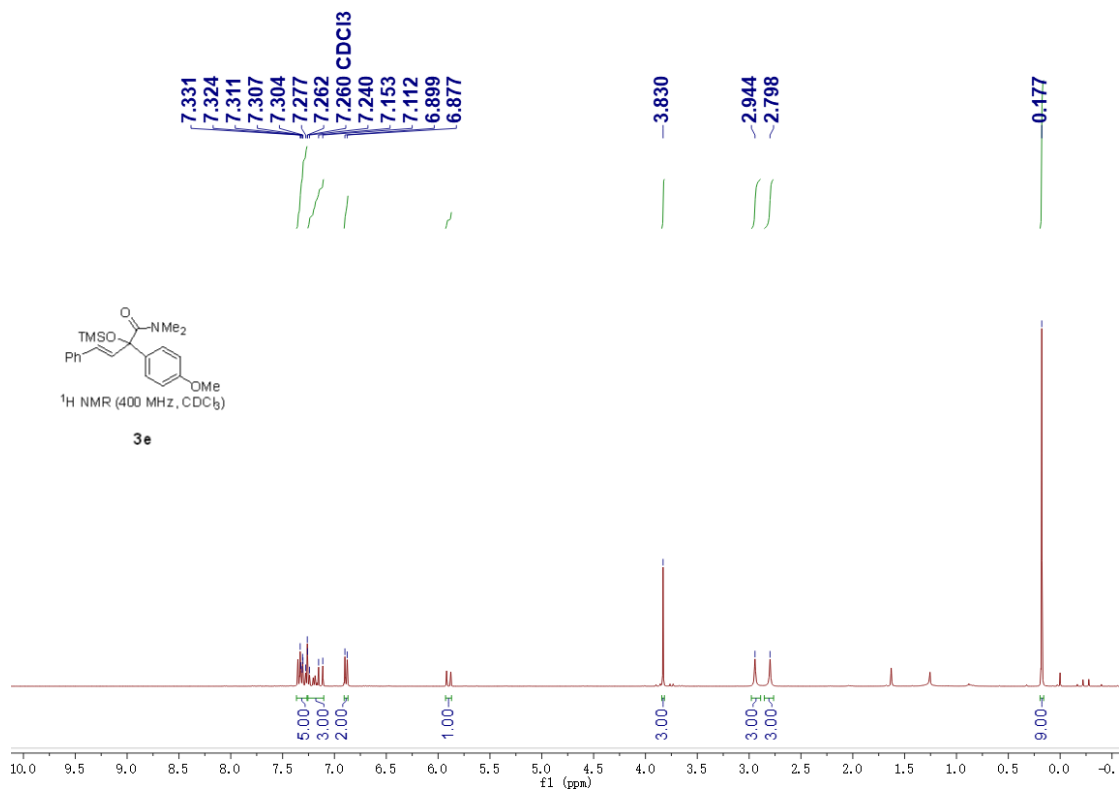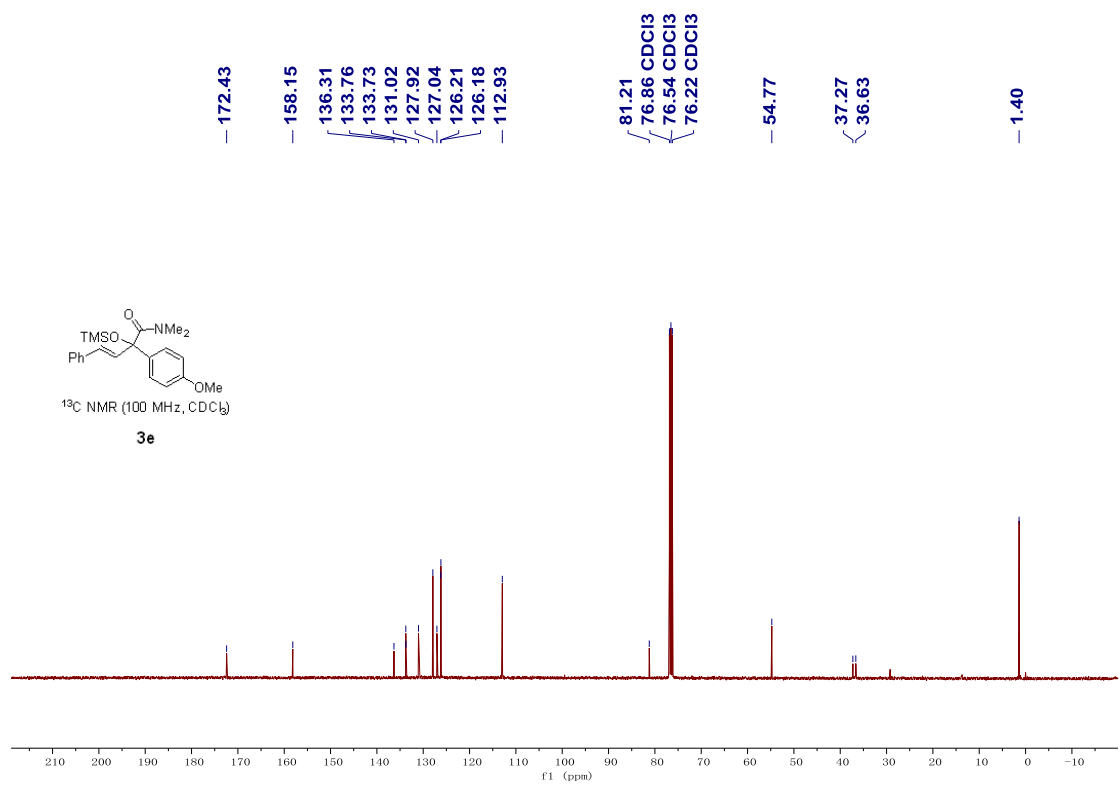

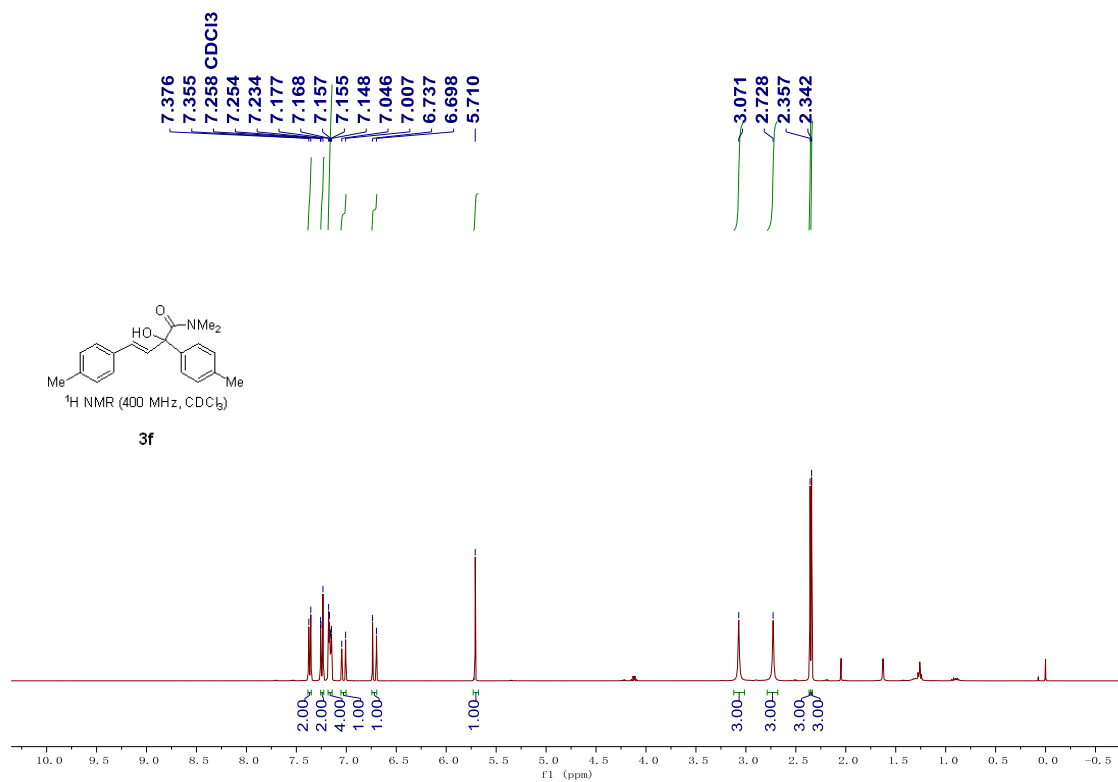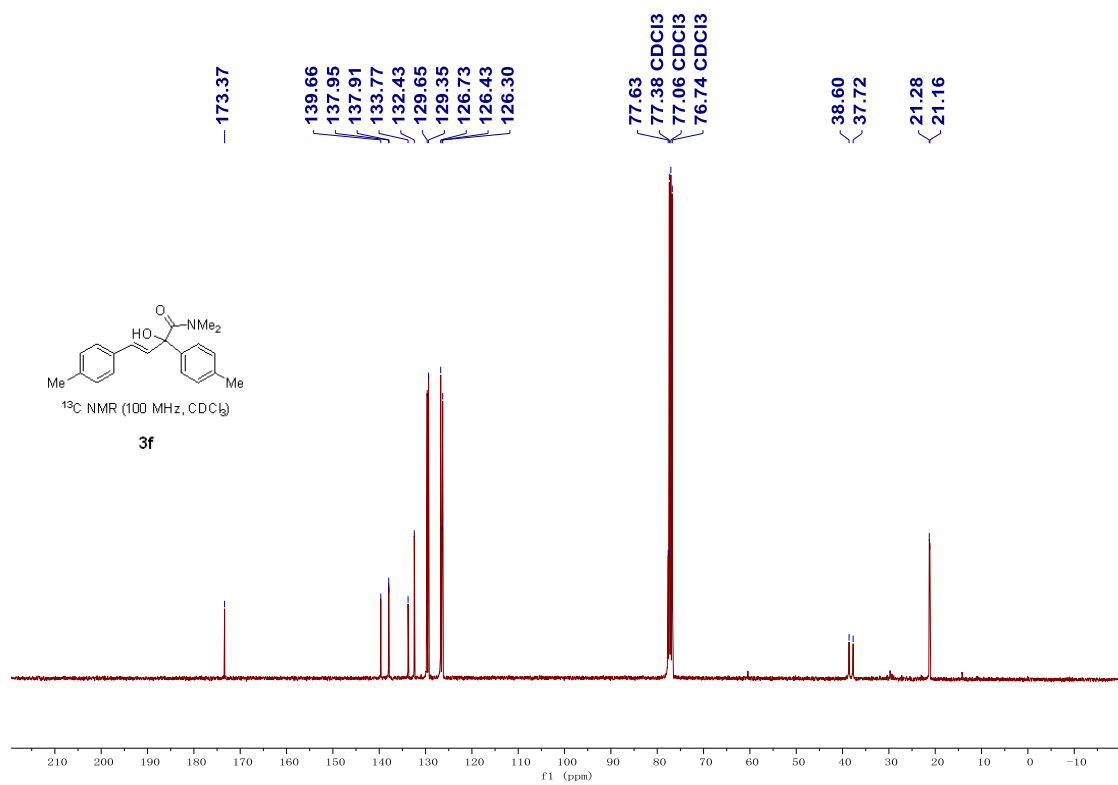

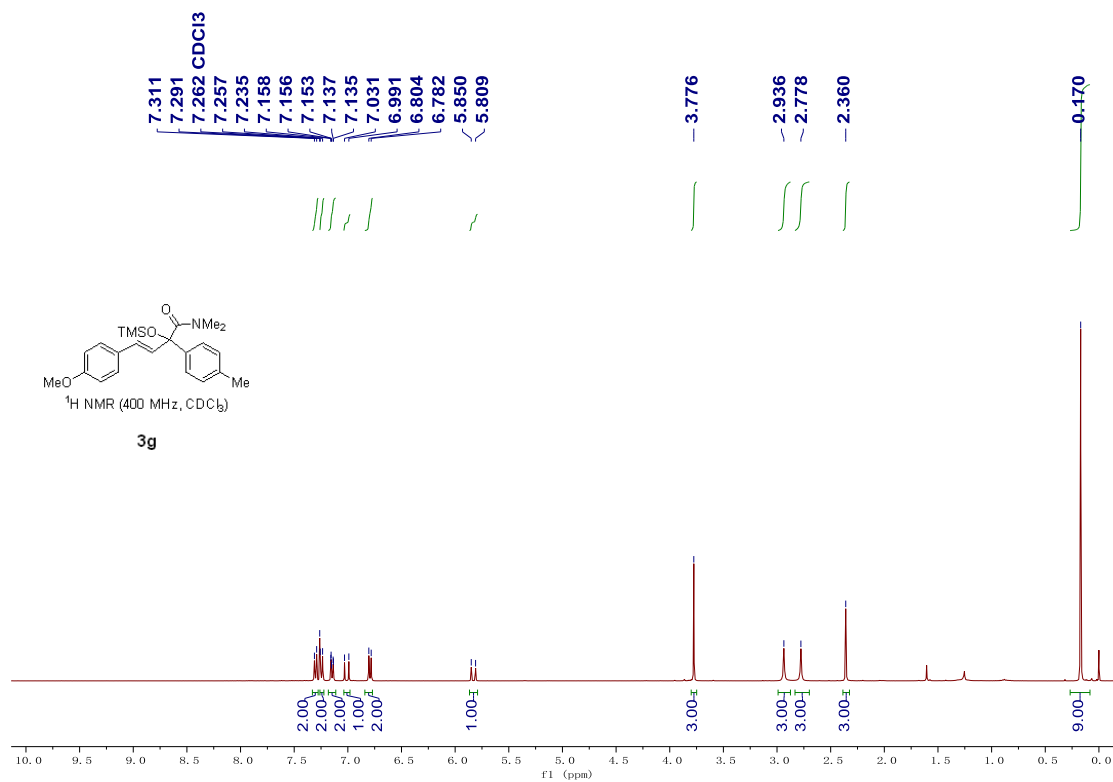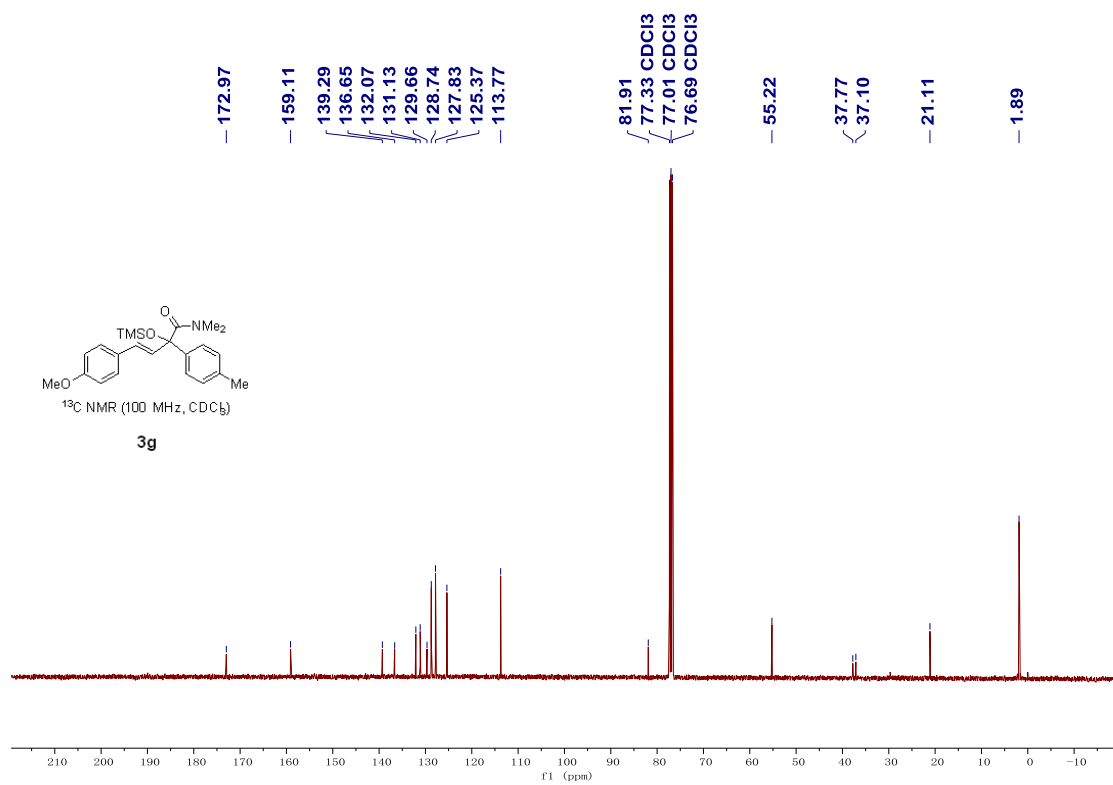

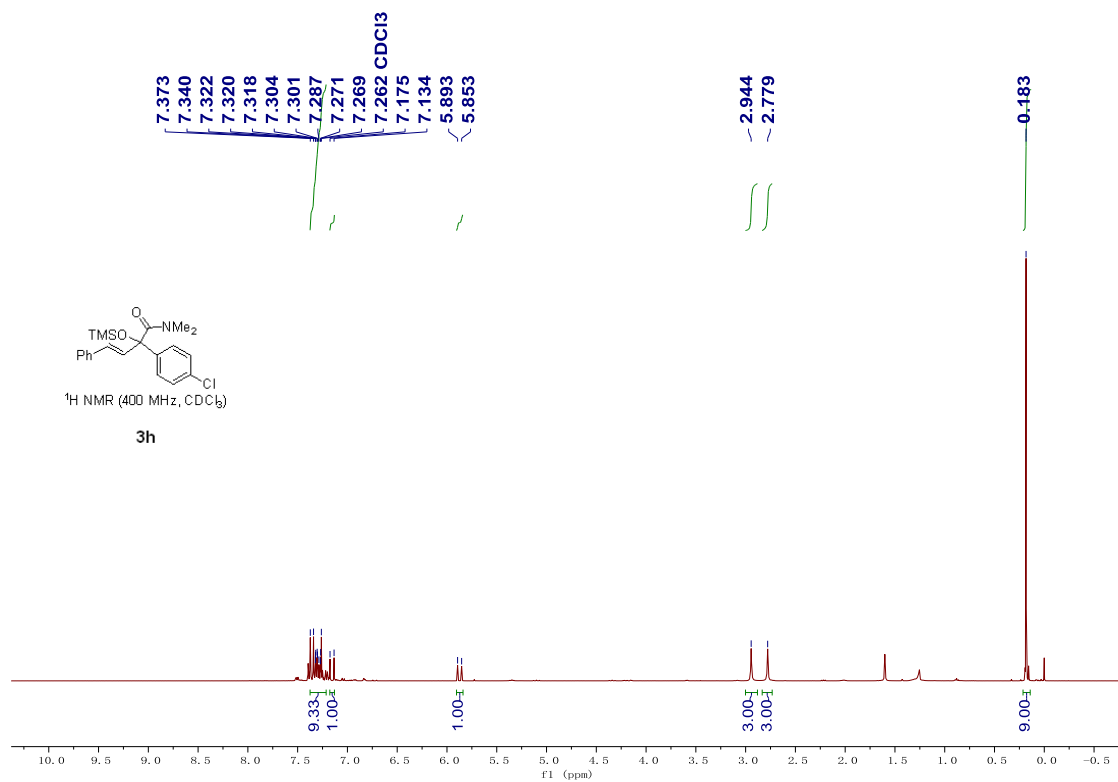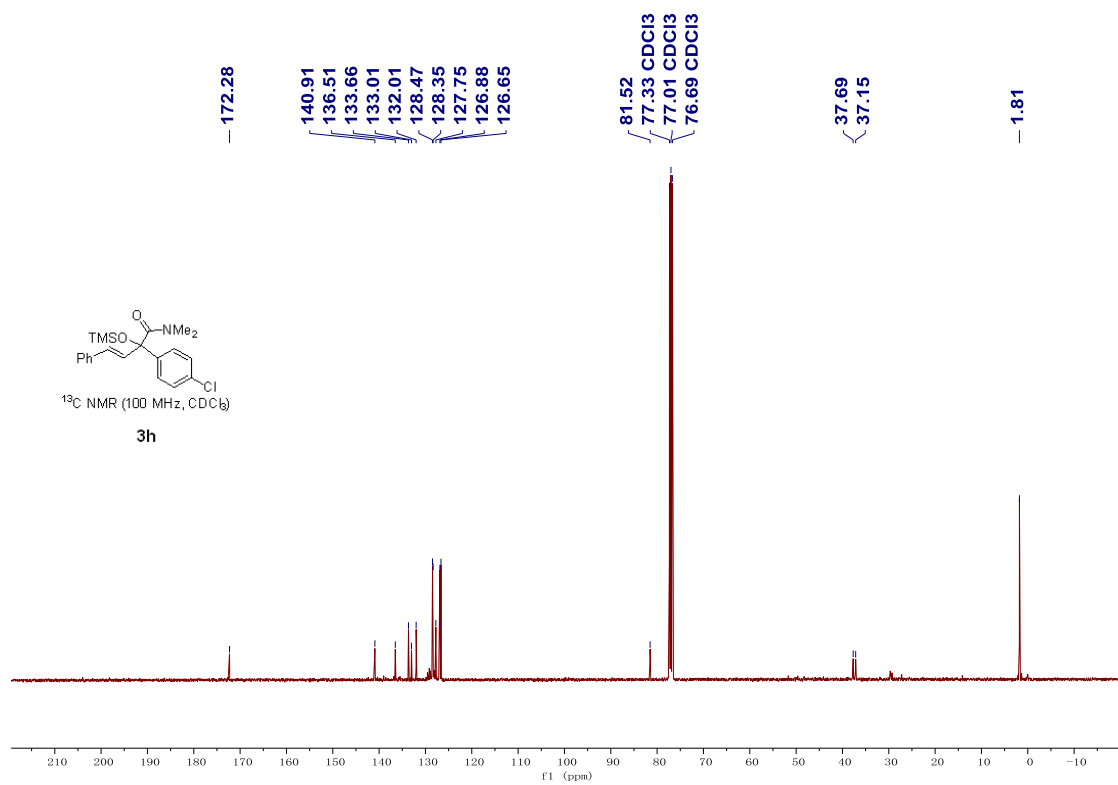

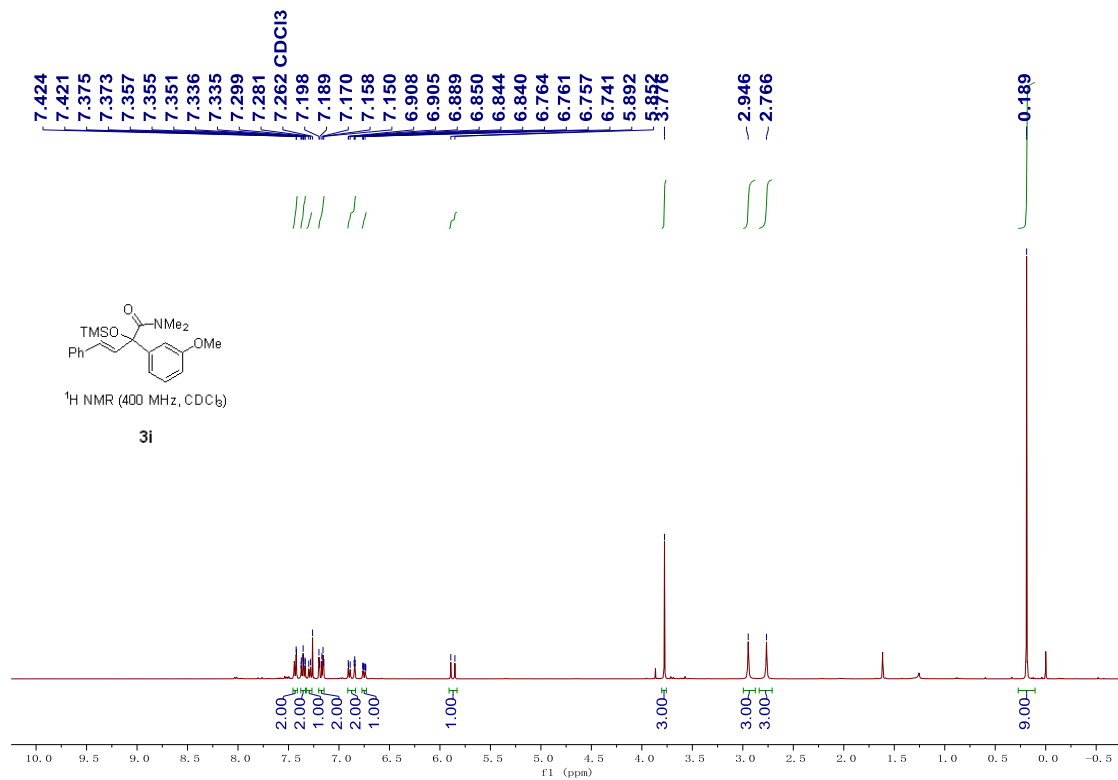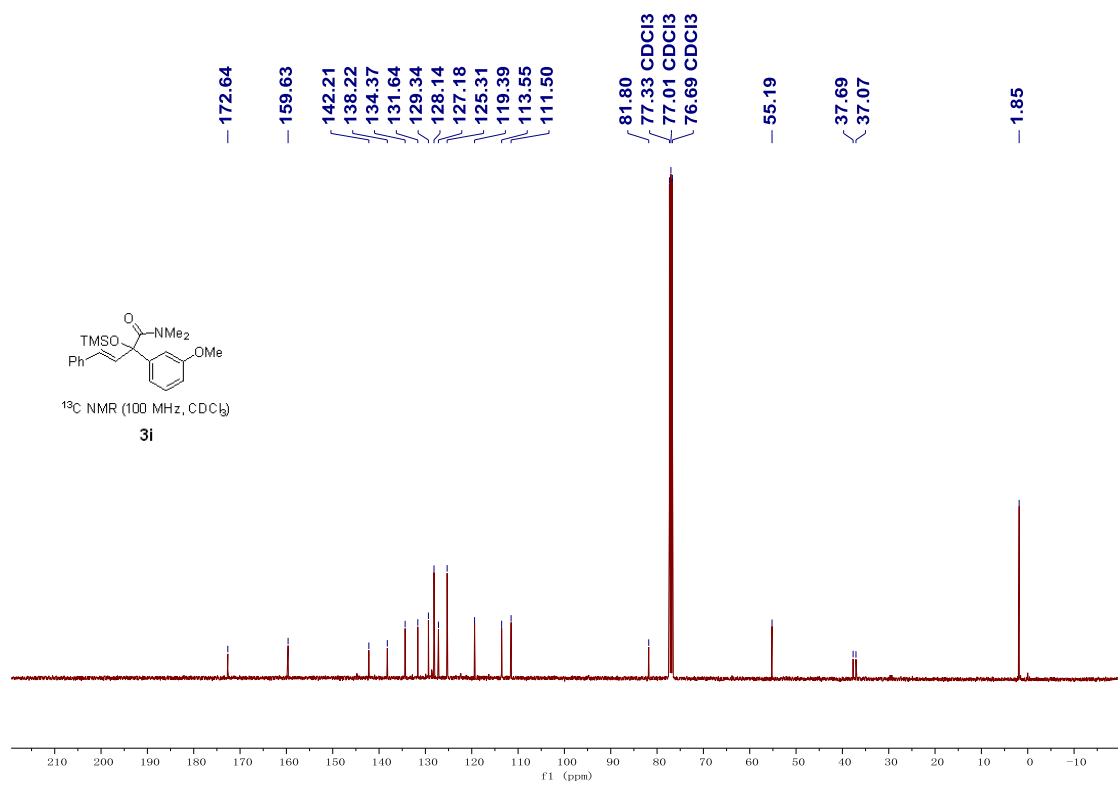

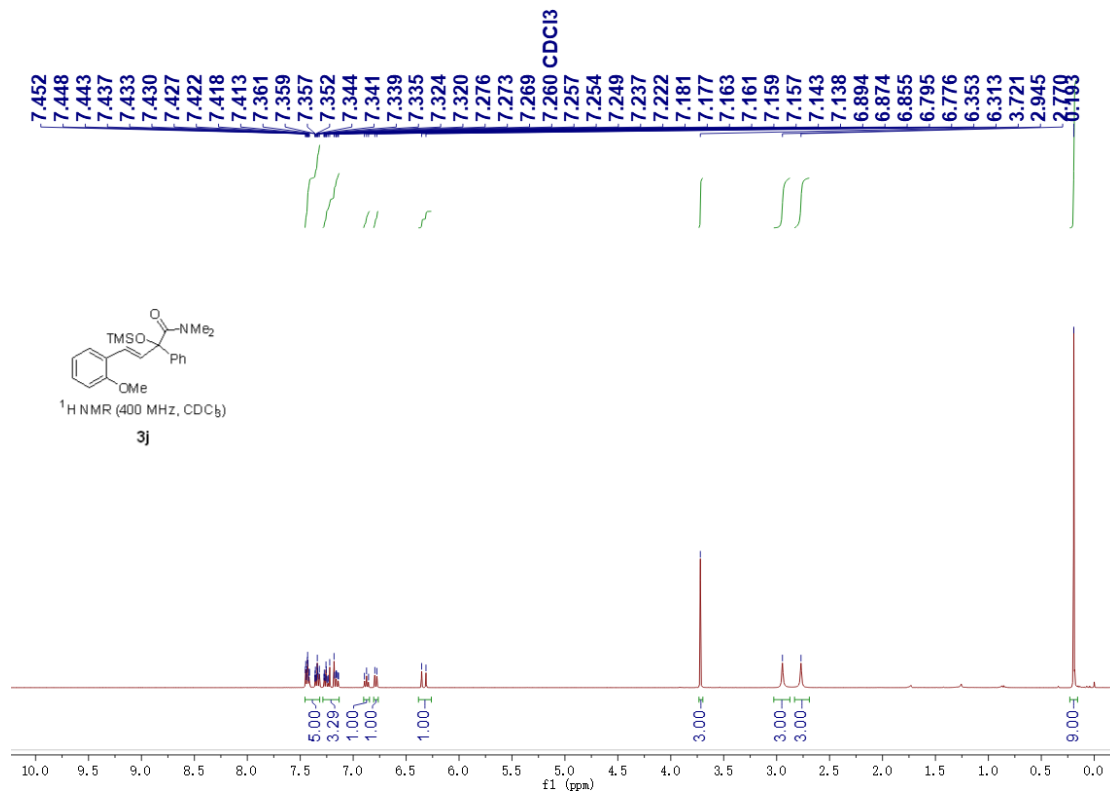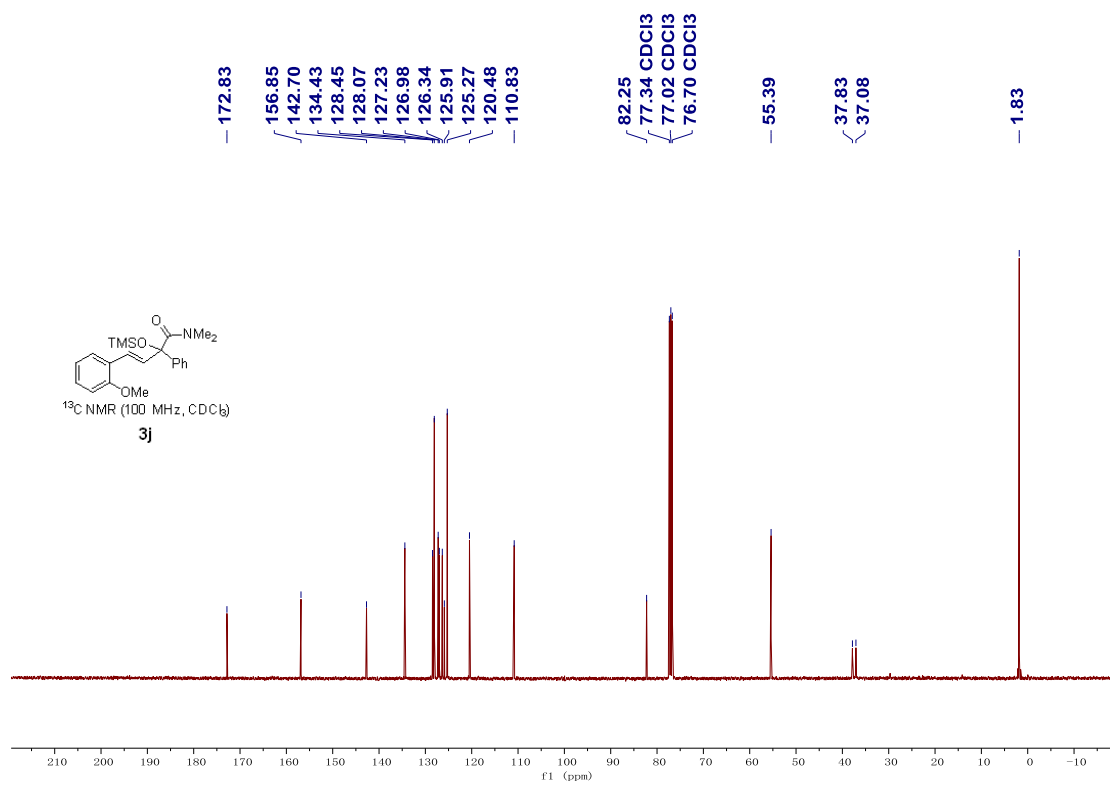



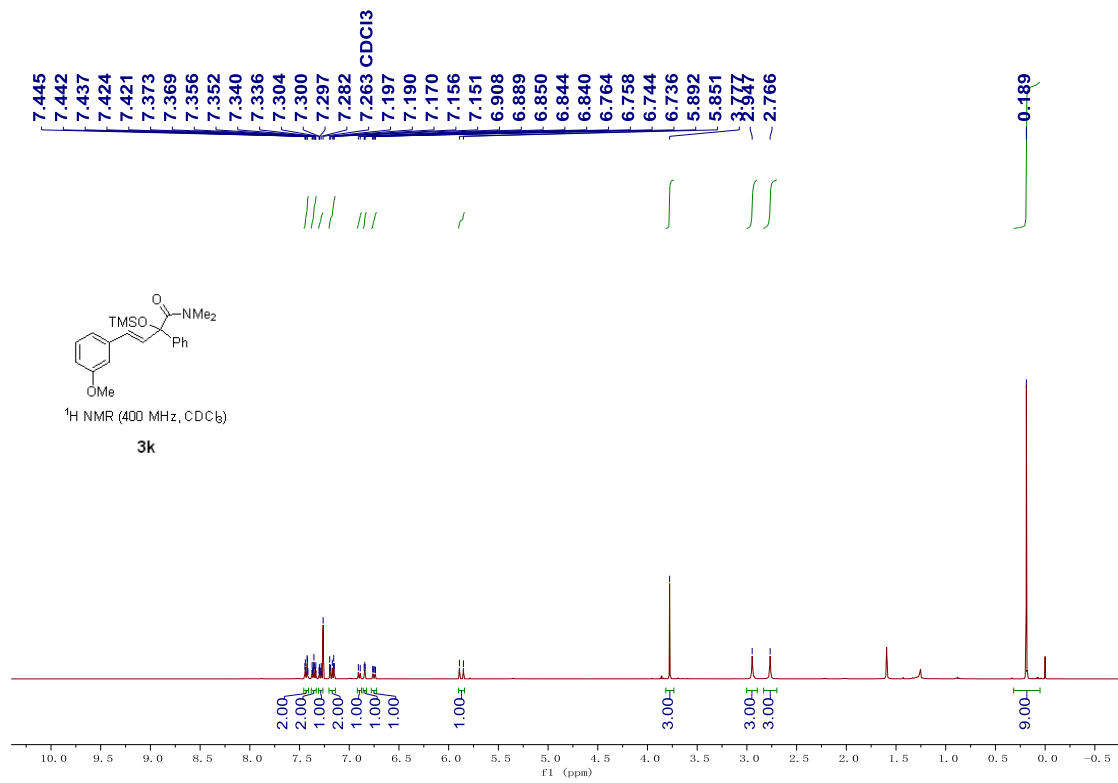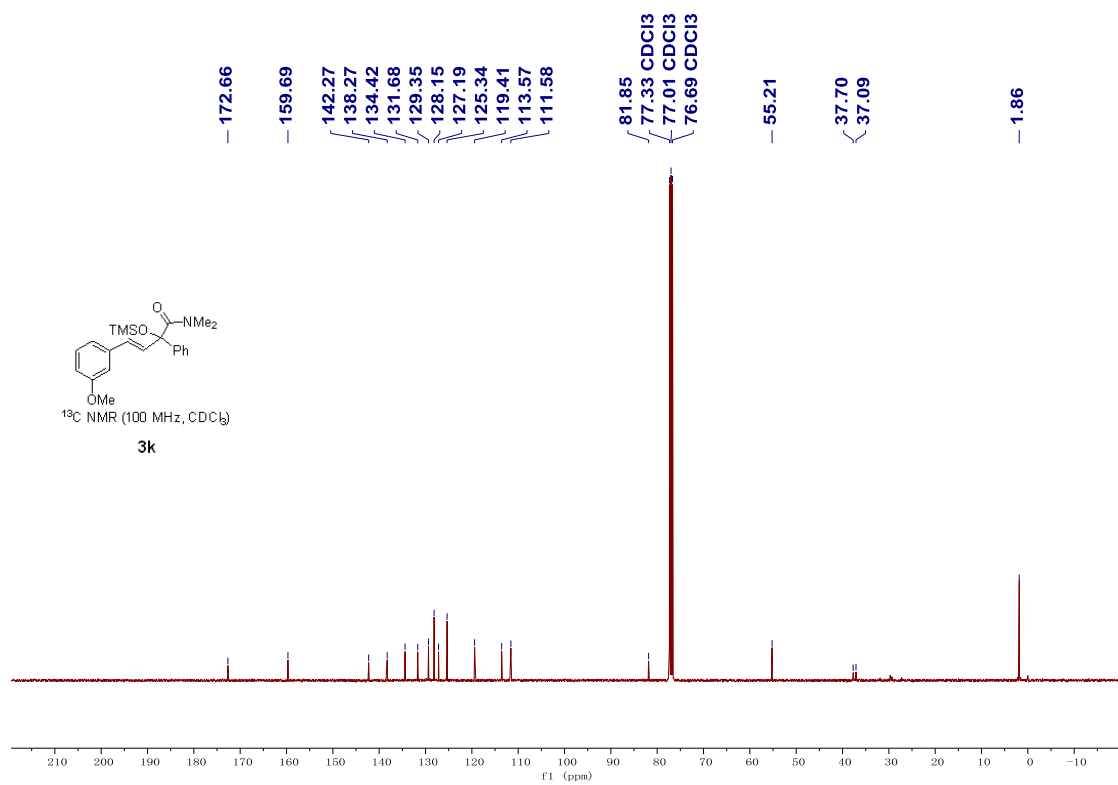

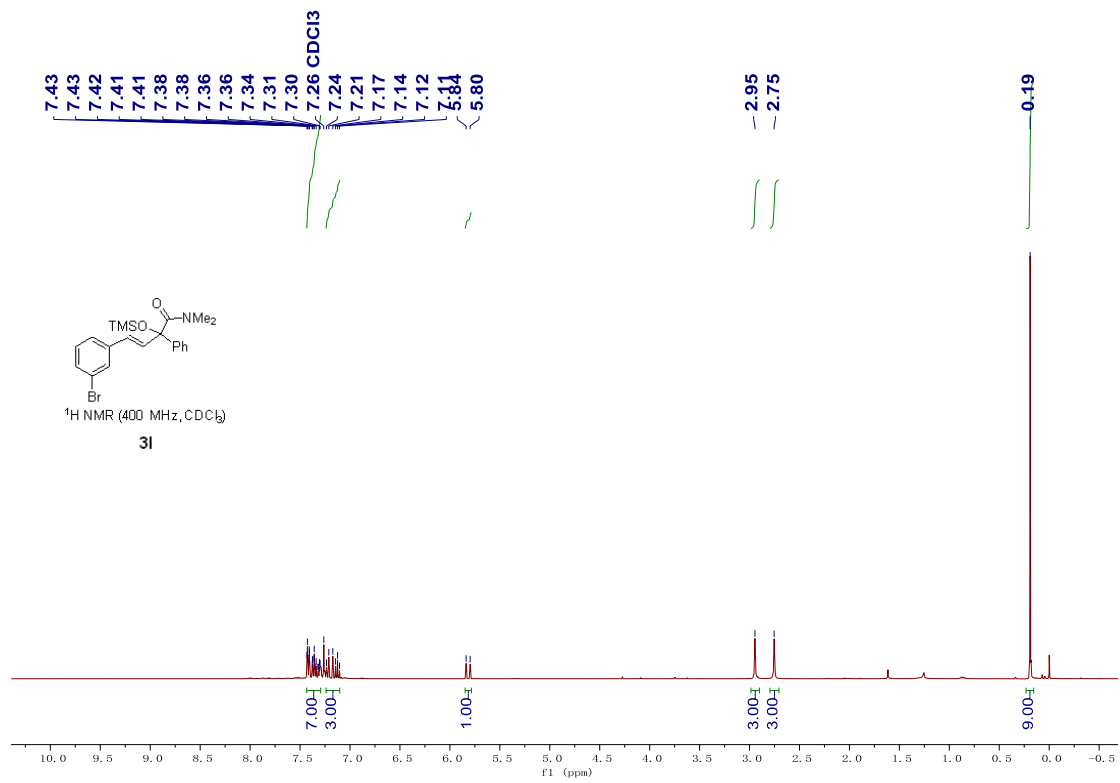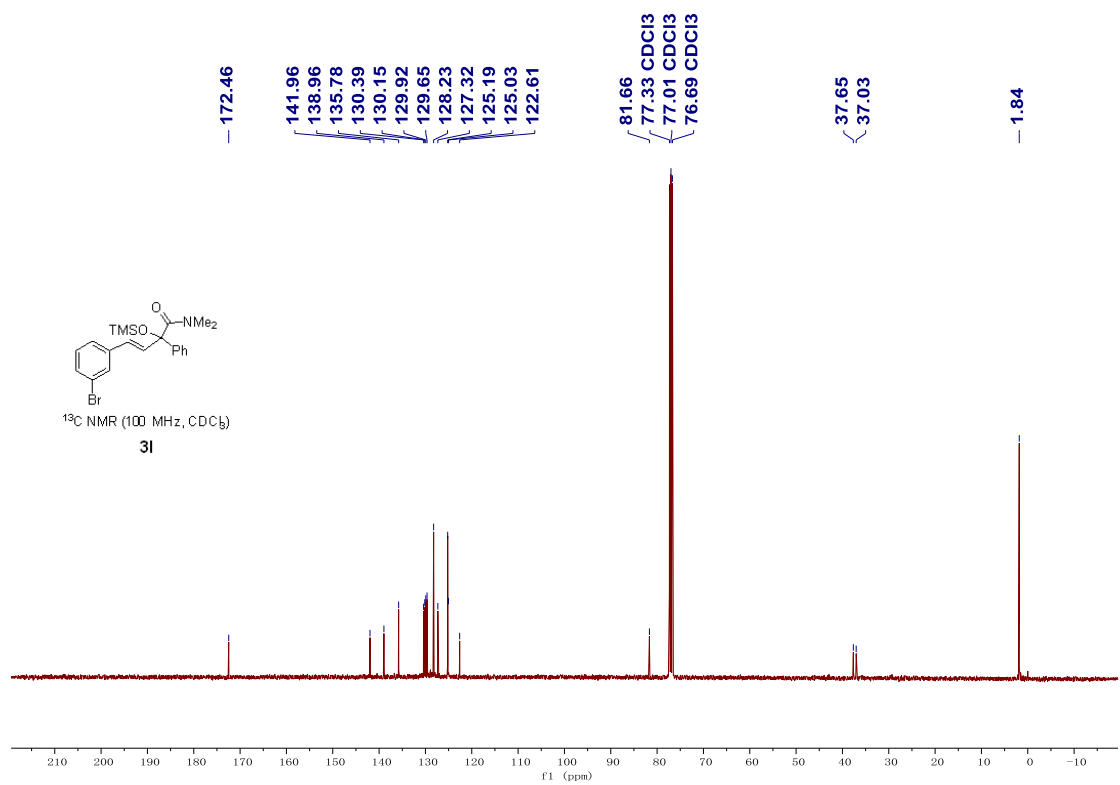

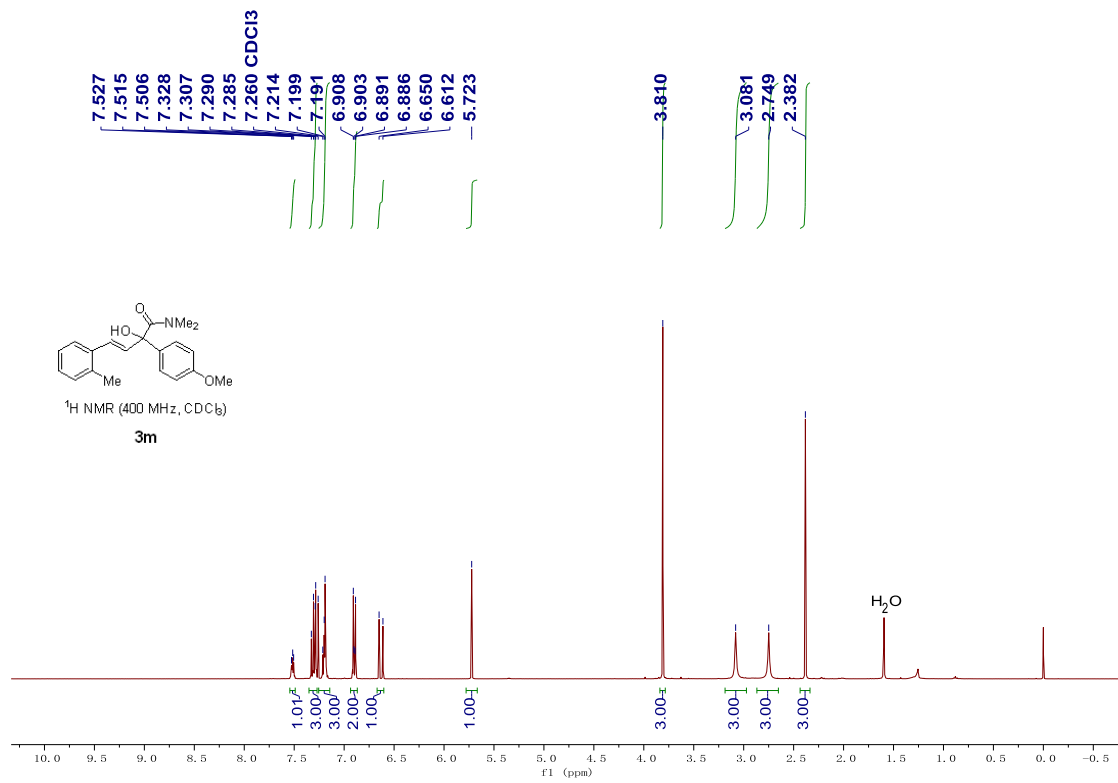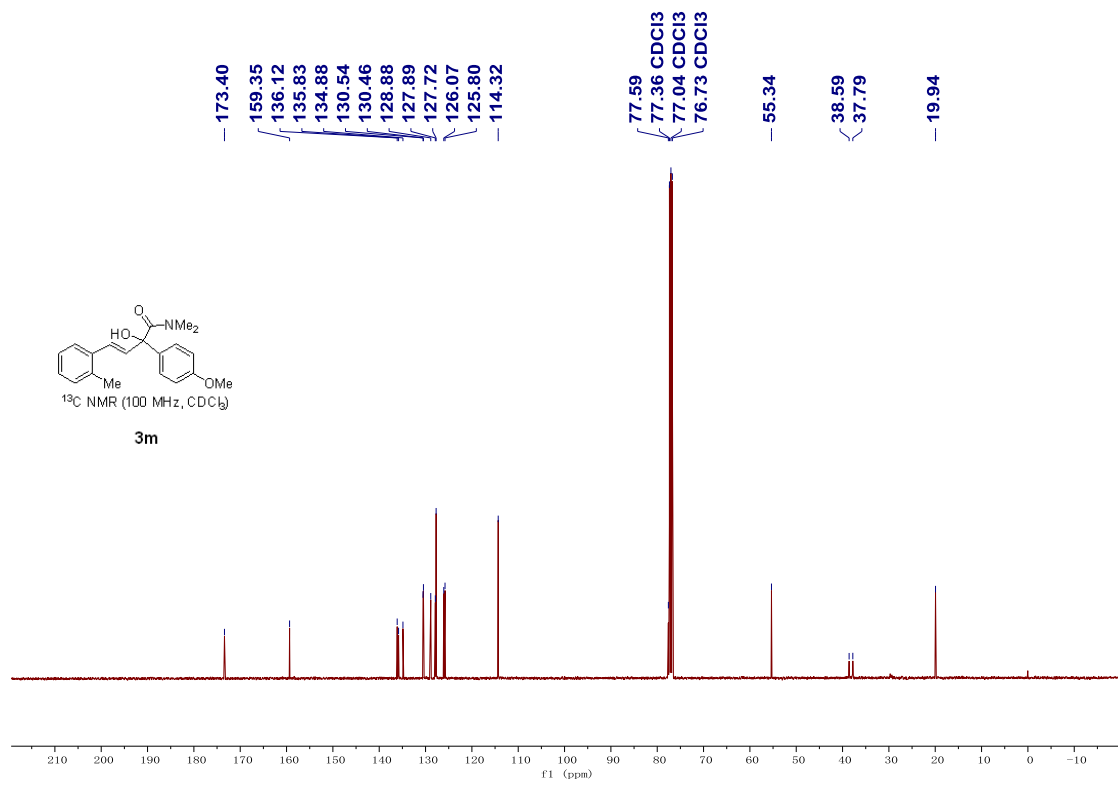

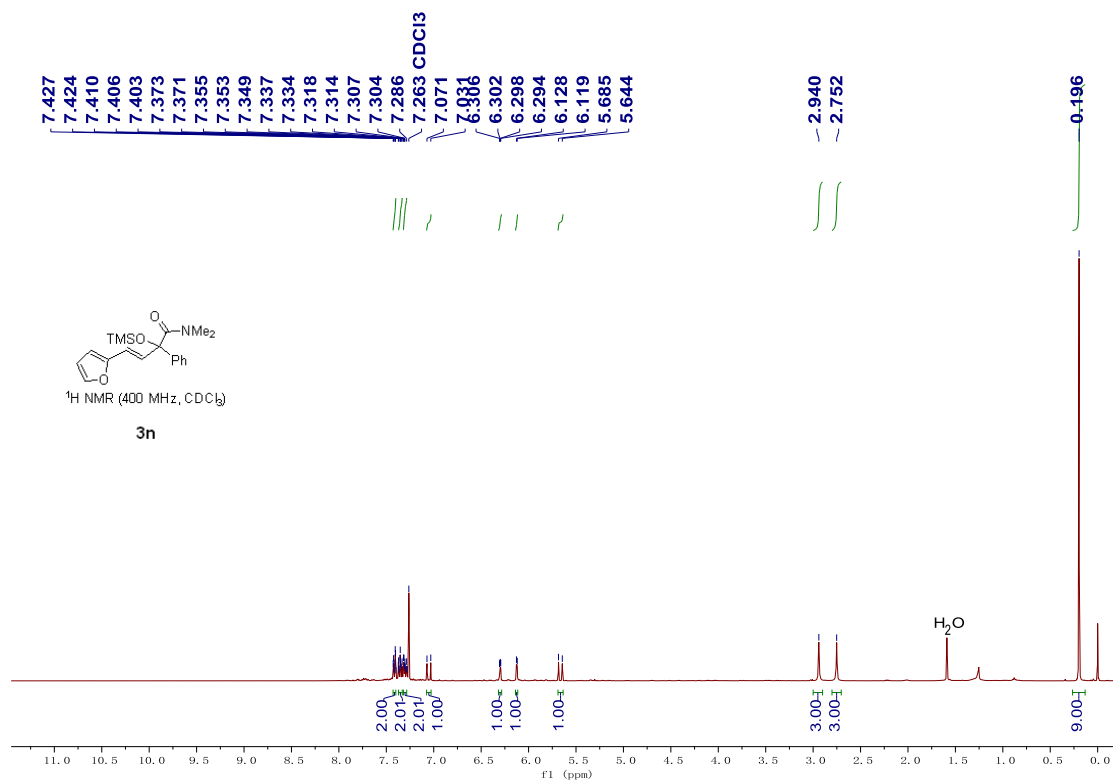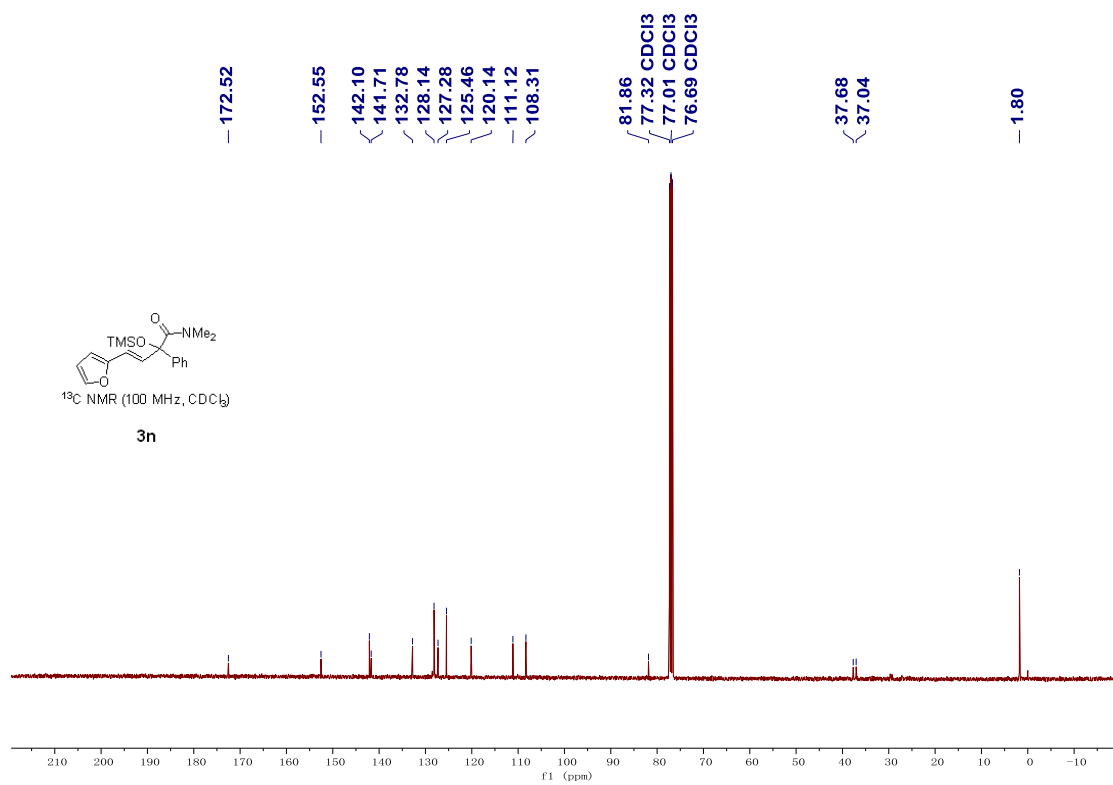

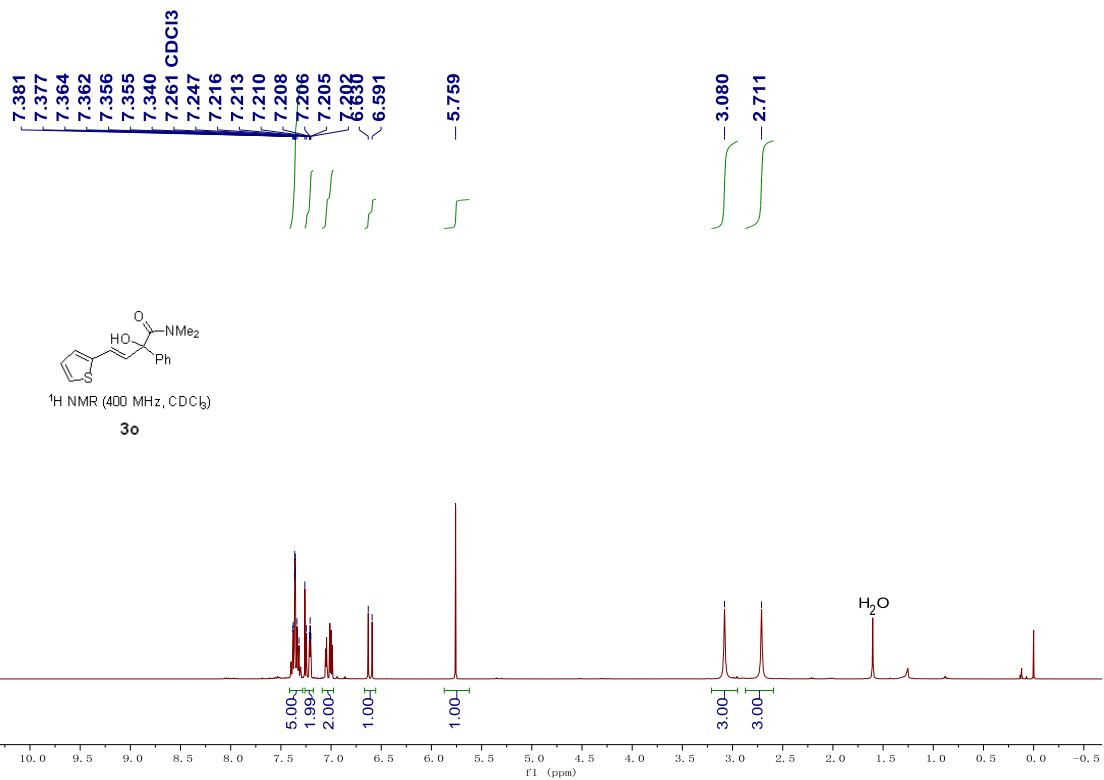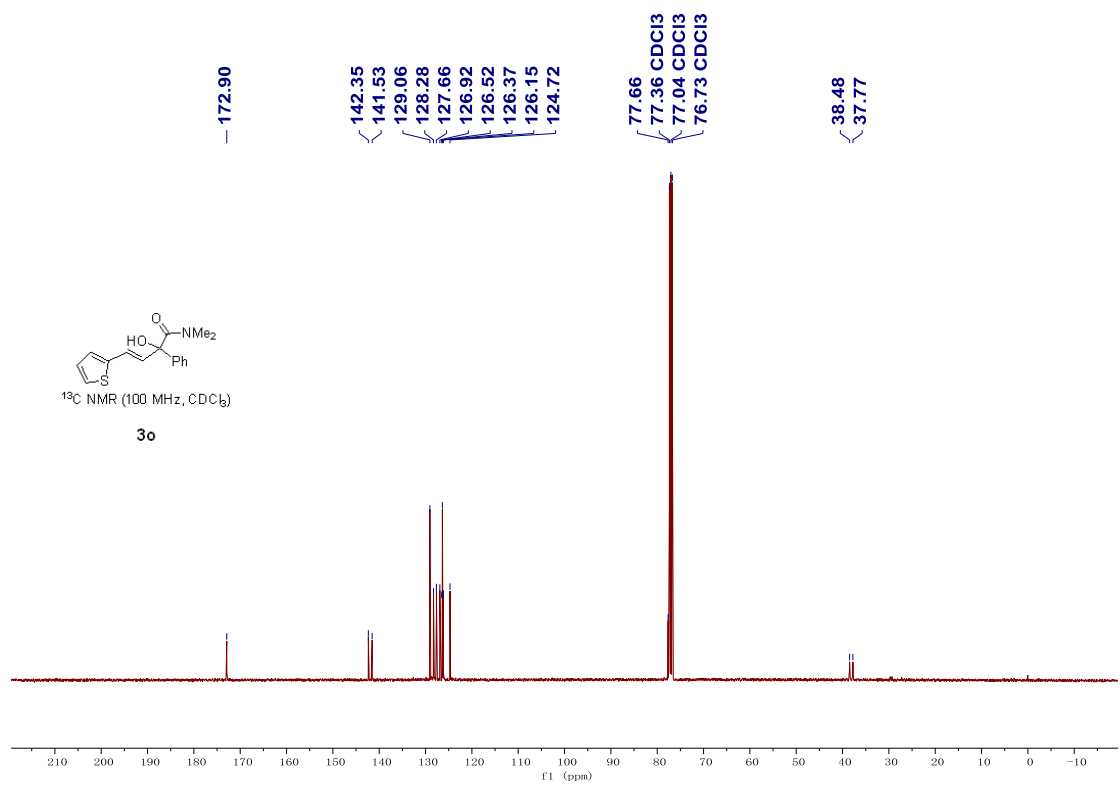

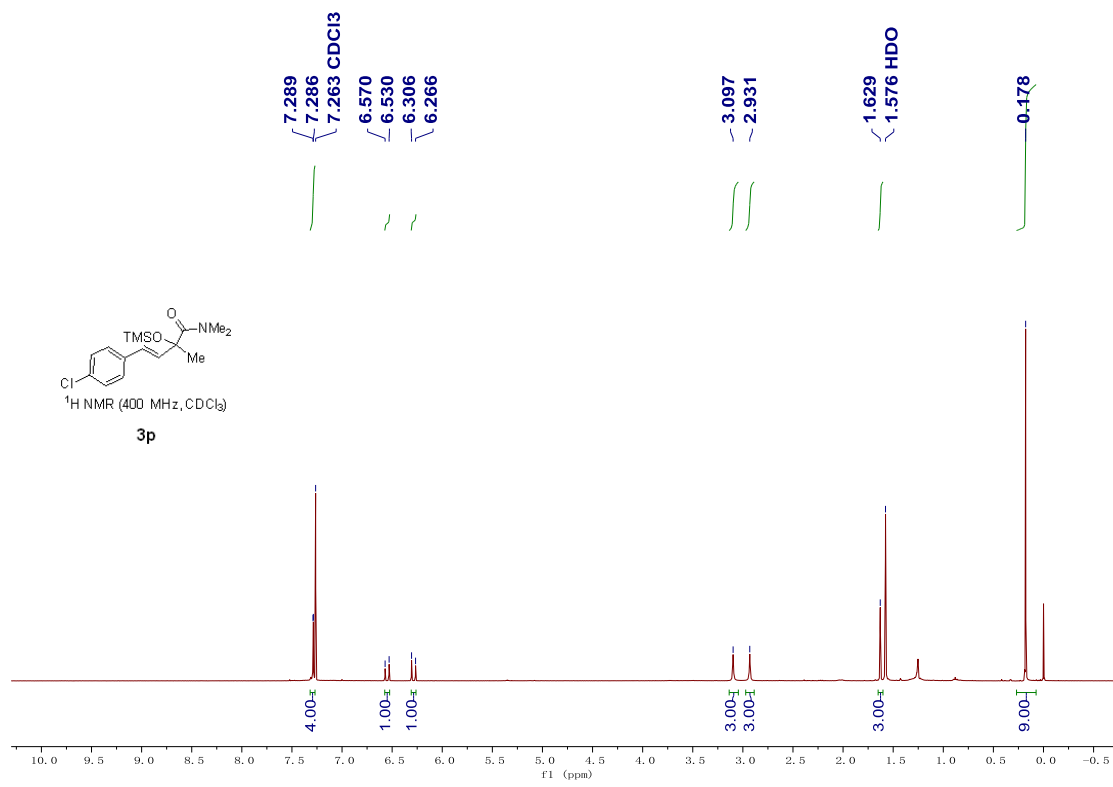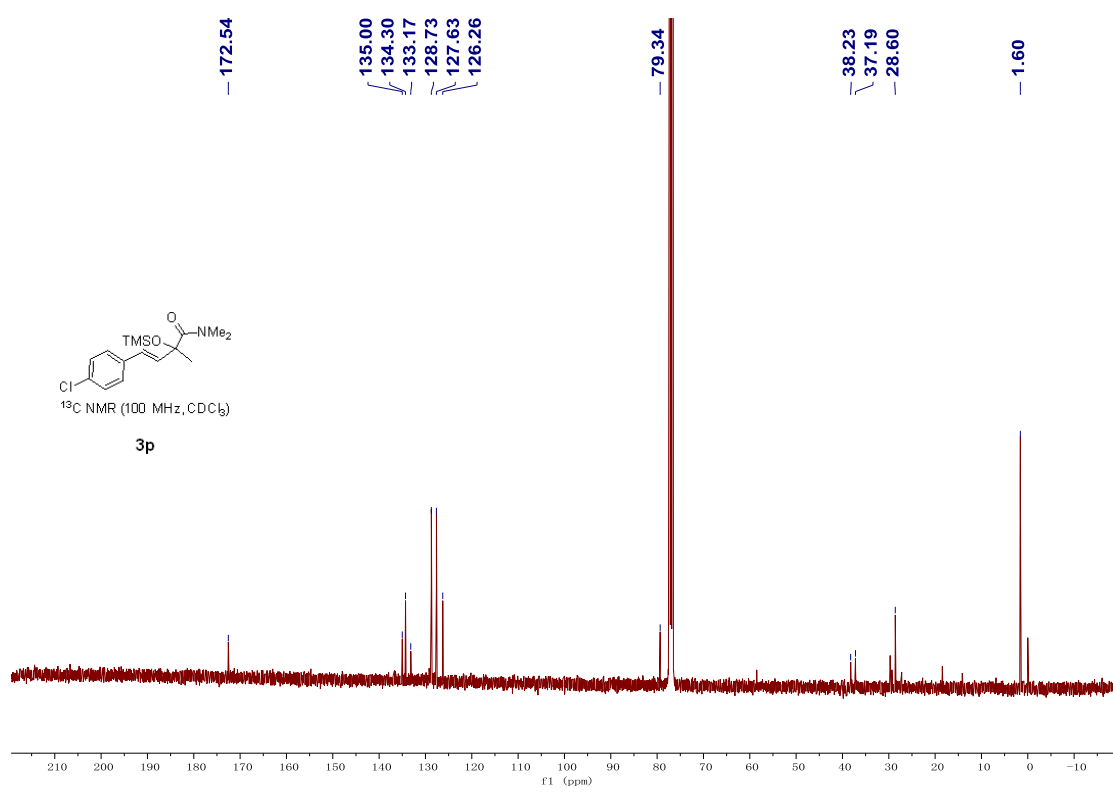

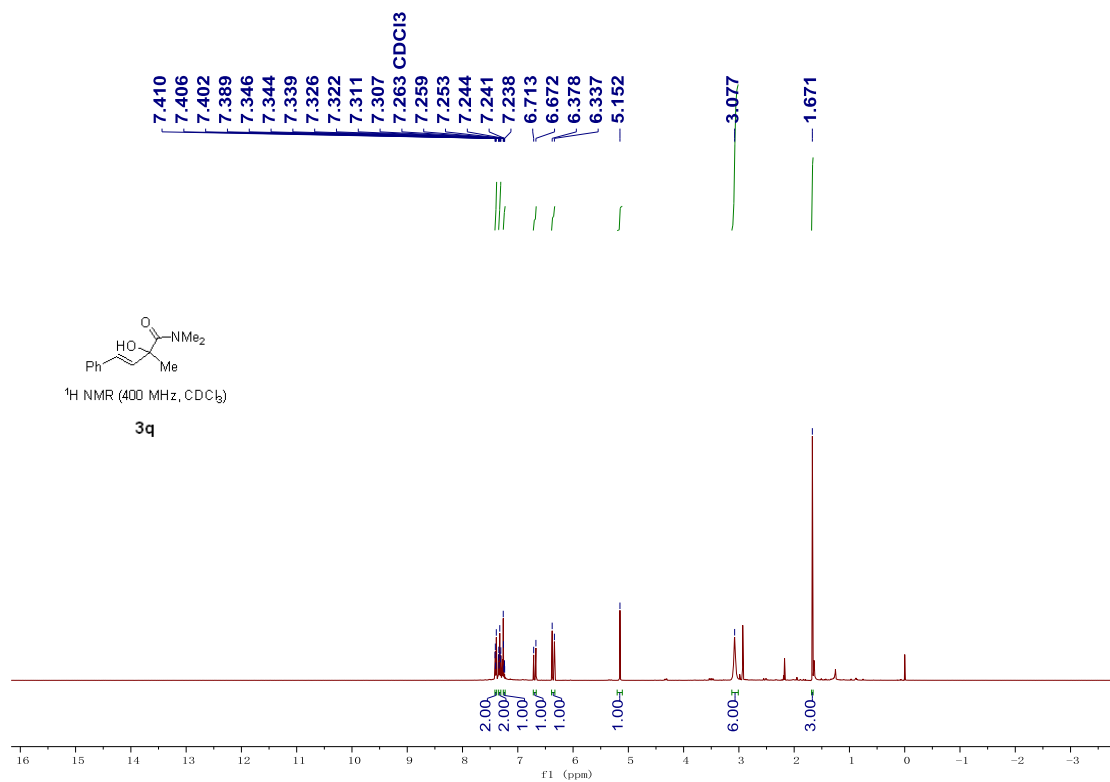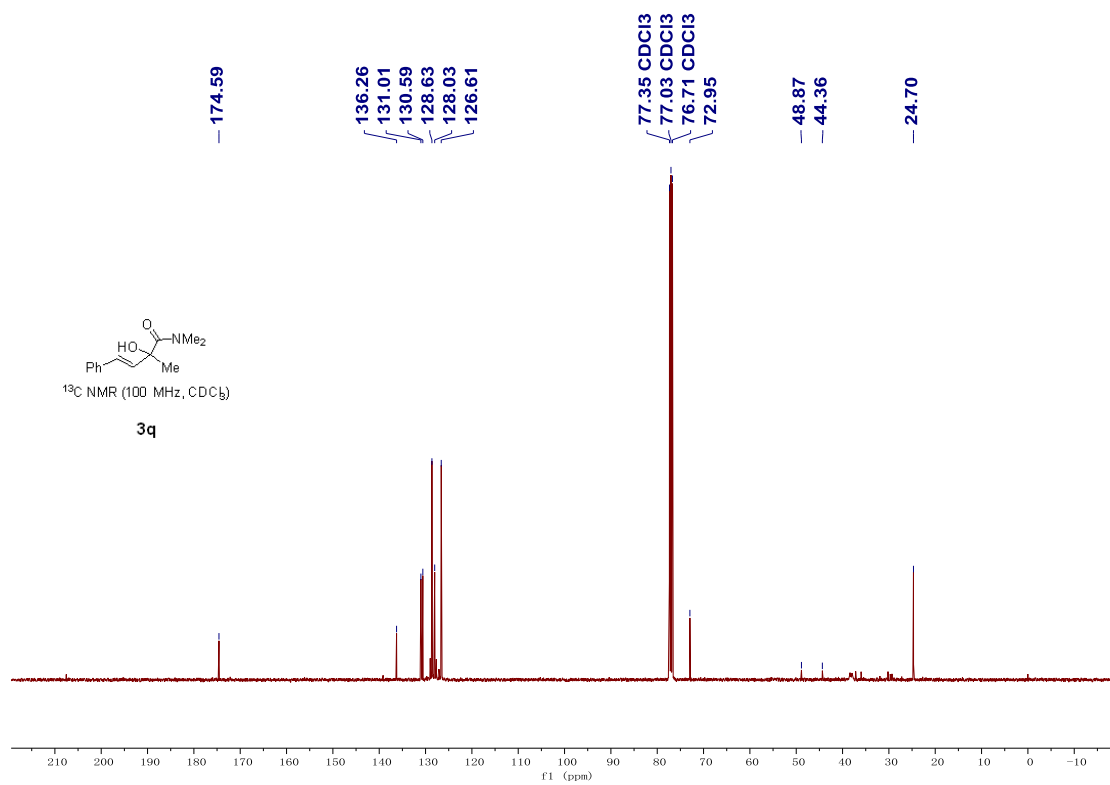

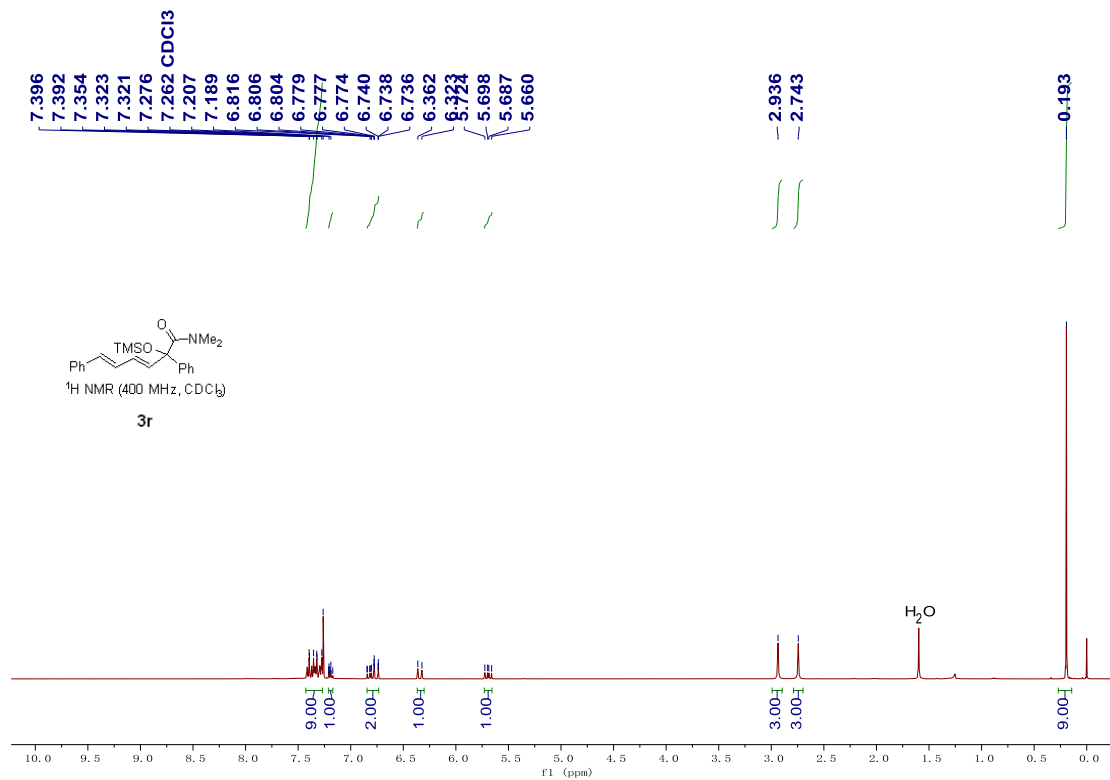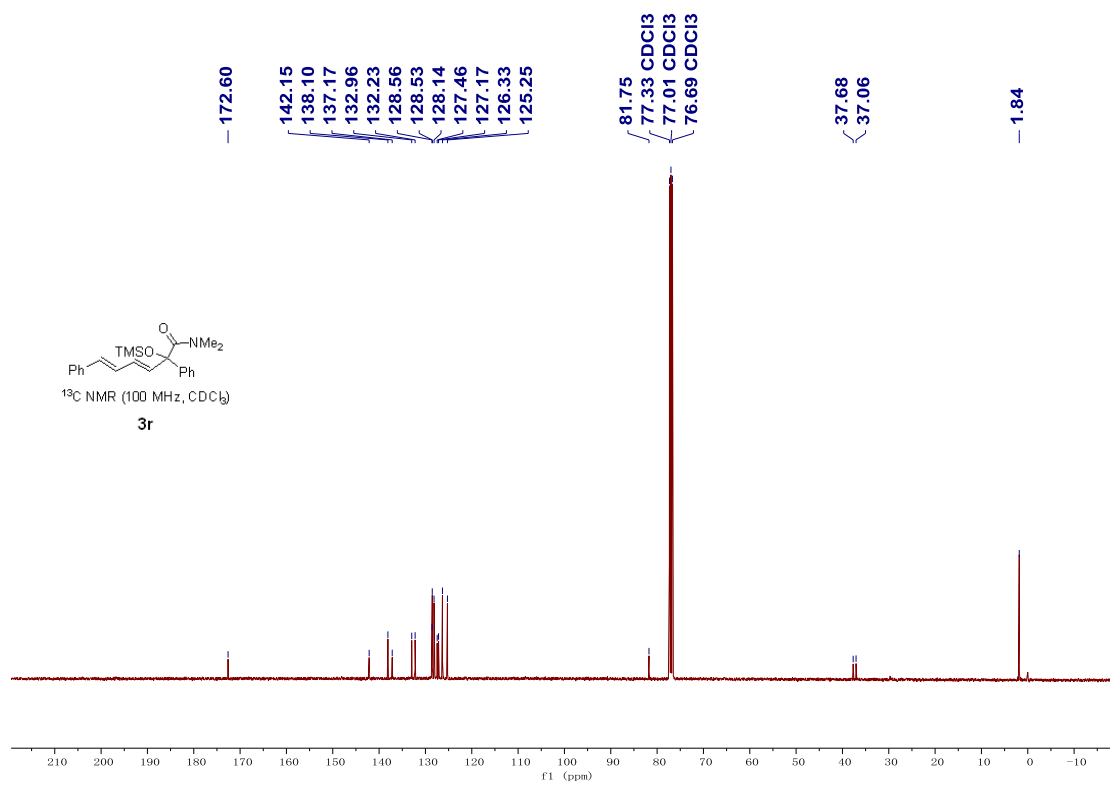



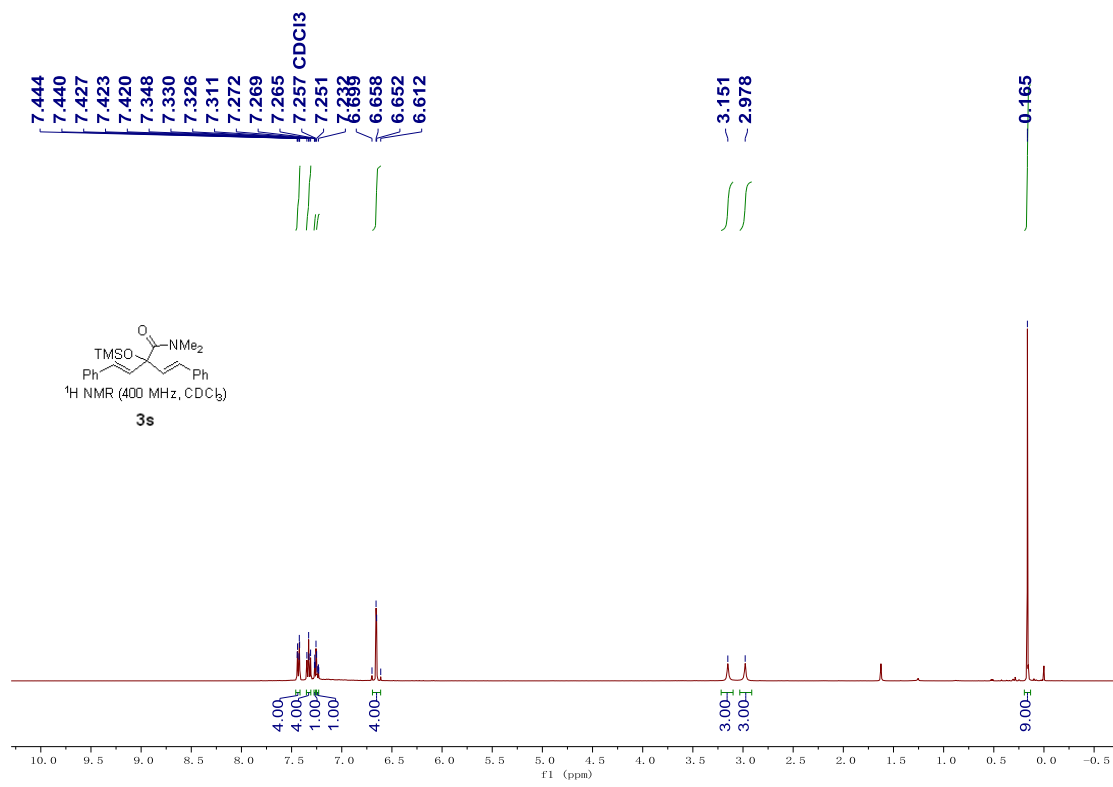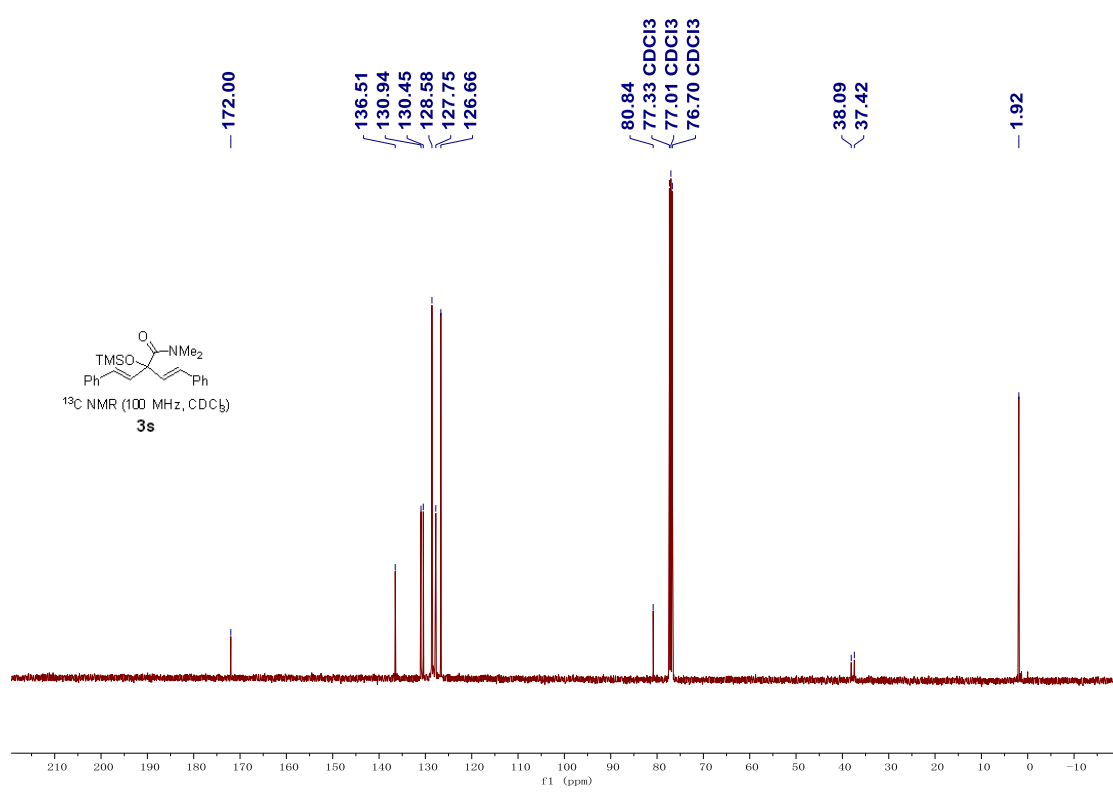

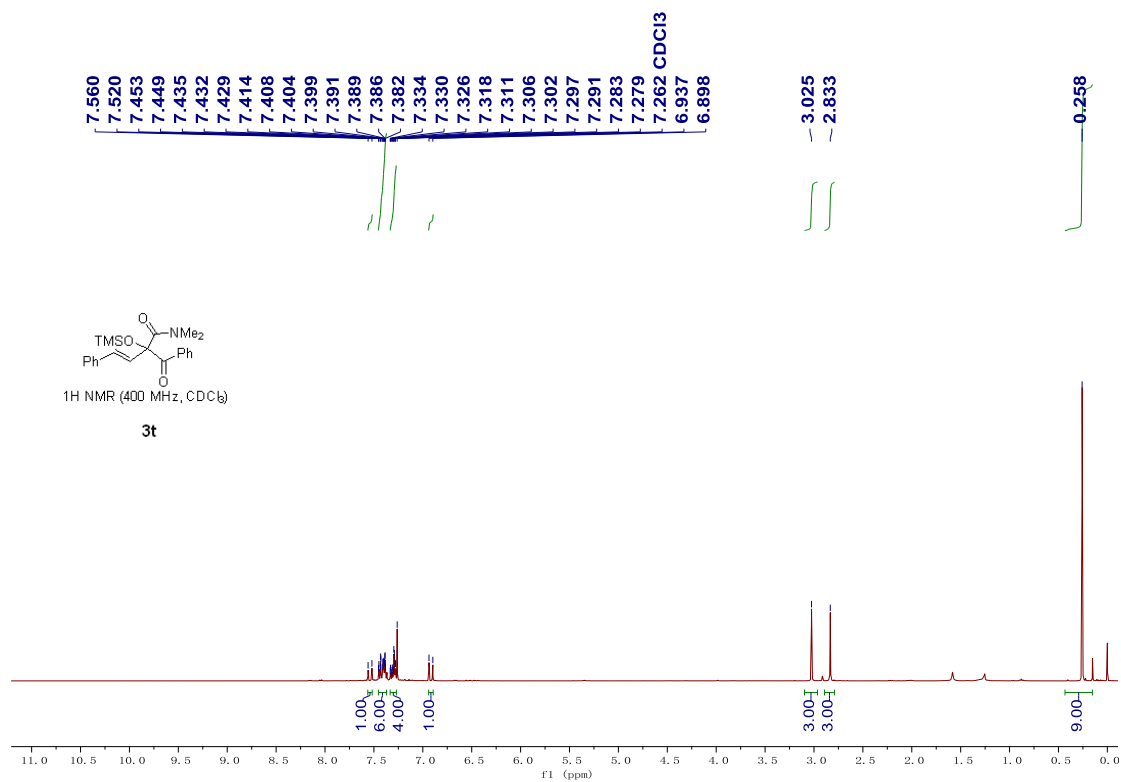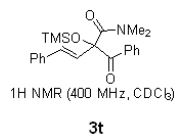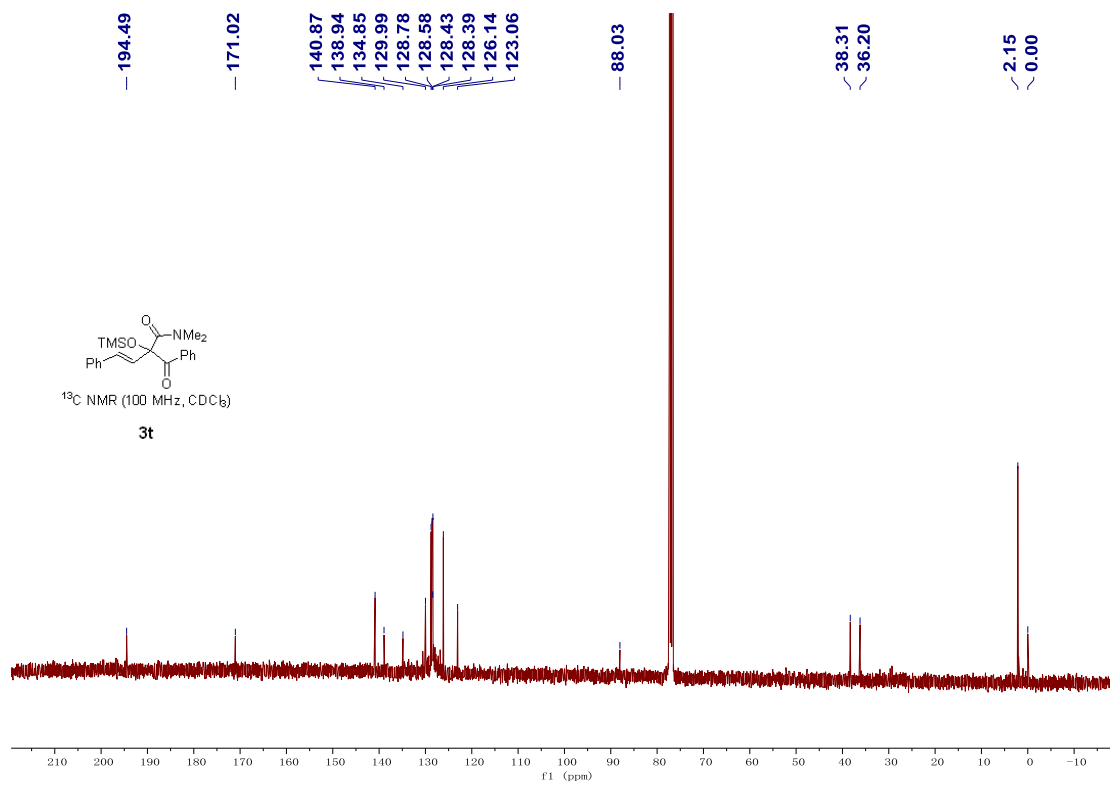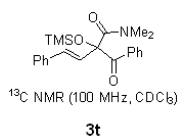

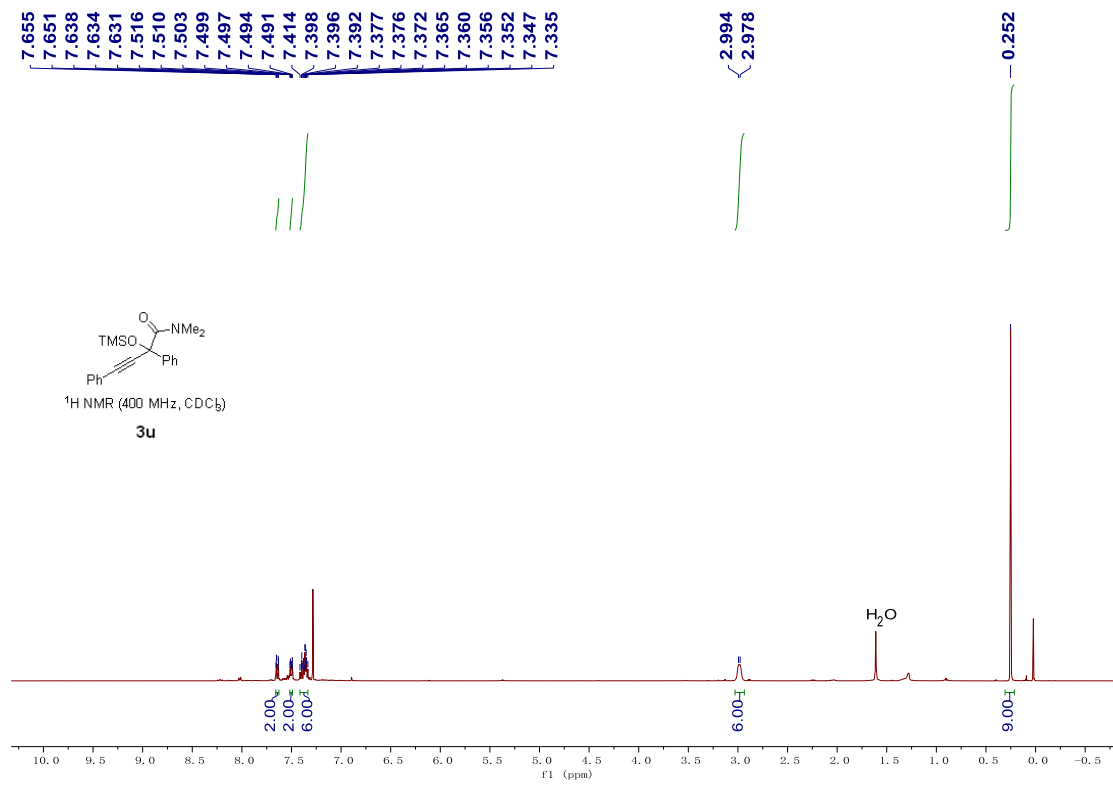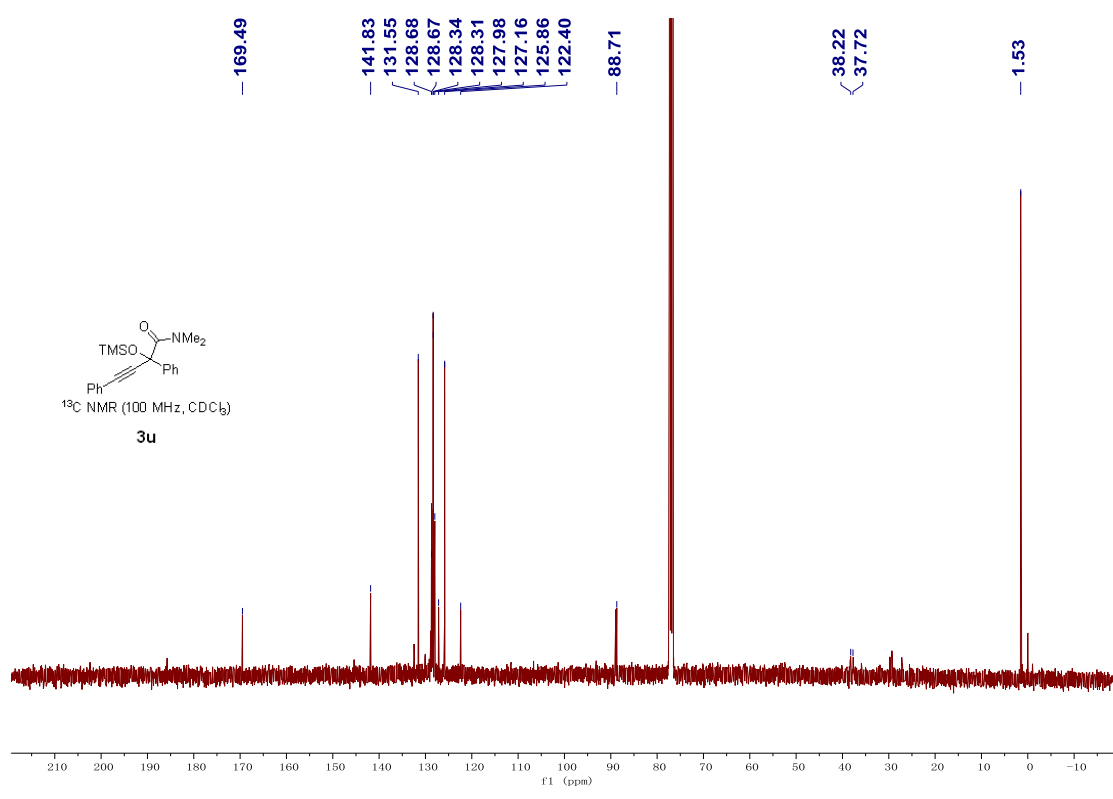

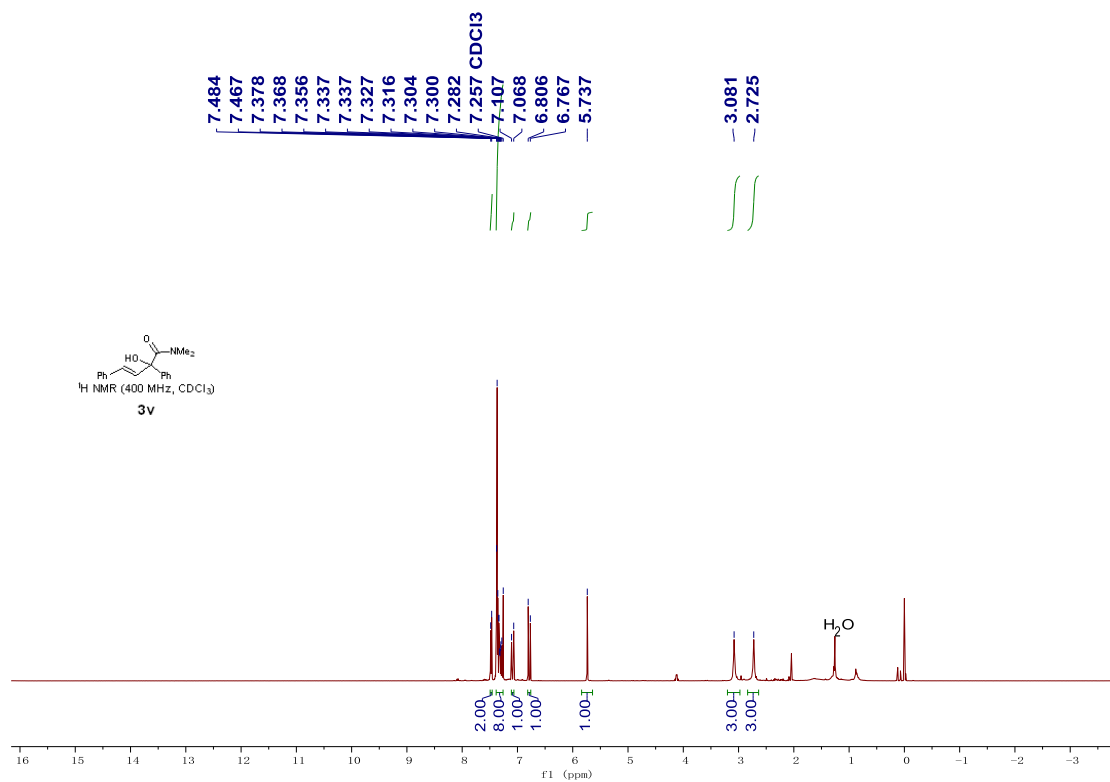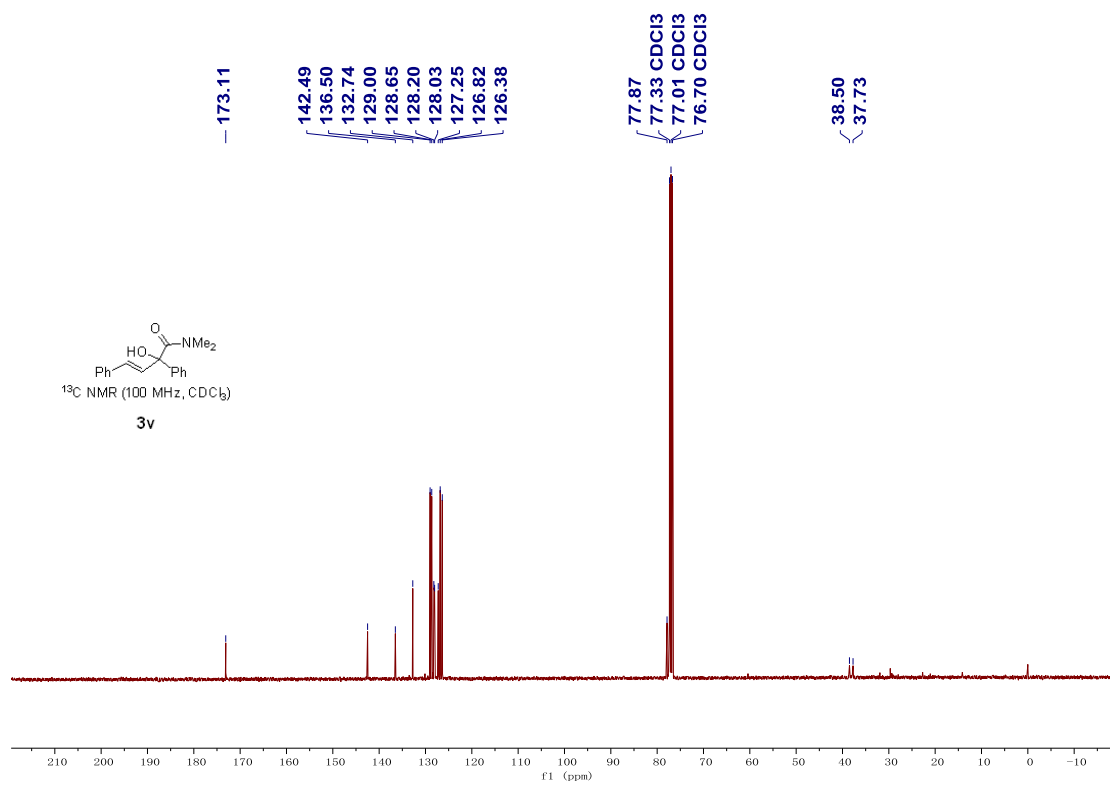

Supplement: d1nj00782c1.pdf [file d1nj00782c1.pdf]
